# Supplementary material for: A Kinome RNAi Screen in Drosophila Identifies Novel Genes Interacting with Lgl, aPKC, and Crb Cell Polarity Genes in Epithelial Tissues
Source: PubMed Central journal article supplement (PMC5555457; doi:10.1534/g3.117.043513), 2017-06-13
Supplement: 2497FileS1.pdf [file 2497FileS1.pdf]

## SUPPORTING INFORMATION

### SUPPLEMENTAL FIGURES

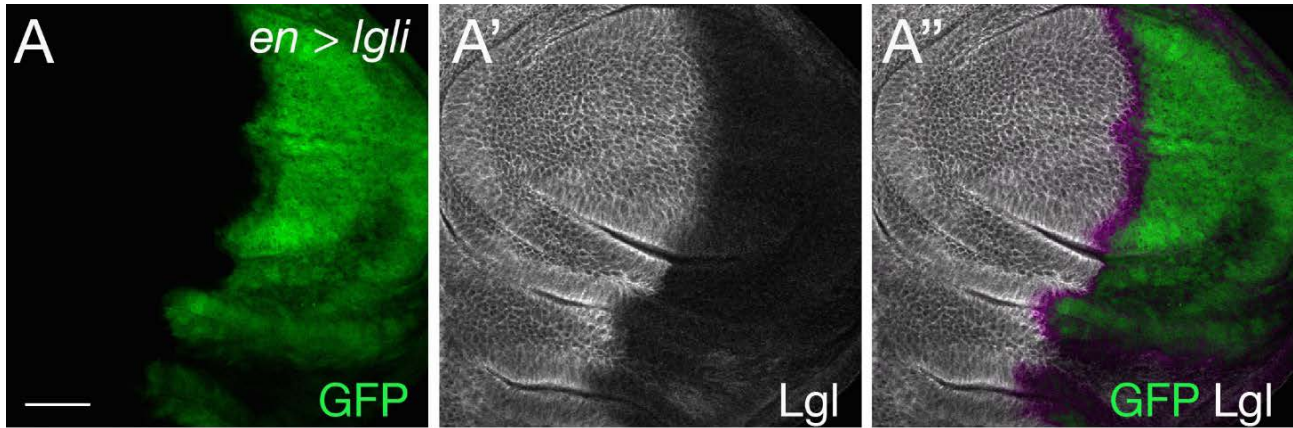

Parsons et al., Supp Figure S1

#### Figure S1. Validation of Lgl depletion

(A, A' and A'') Planar section of larval wing disc. Posterior is to the left. White scale bar represents 50 $\mu$ M.

(A) *en > GFP; Igli* wing disc posterior domain expression *en-GAL4* revealed by GFP+ tissue.

(A') Lgl staining shows reduced Lgl levels in posterior *en-GAL4* GFP+ tissue.

(A'') overlay of GFP+ tissue and Lgl staining confirms depletion of Lgl in posterior *en-GAL4* expression domain.

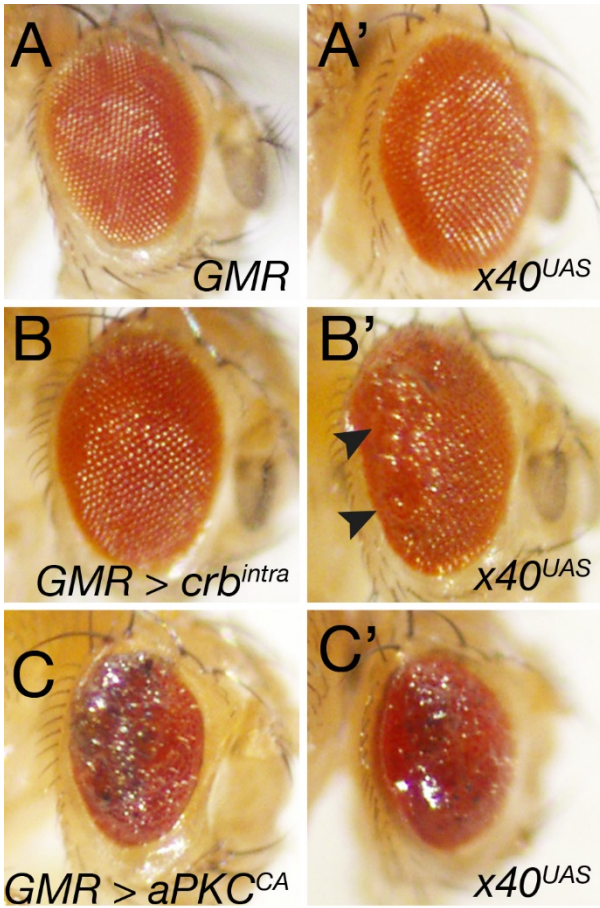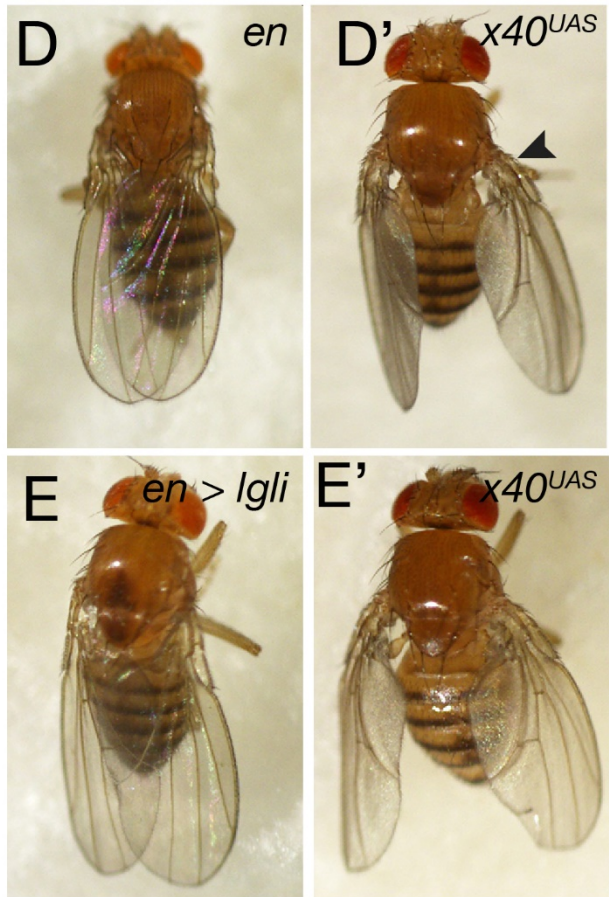

Parsons et al., Supp Figure S2

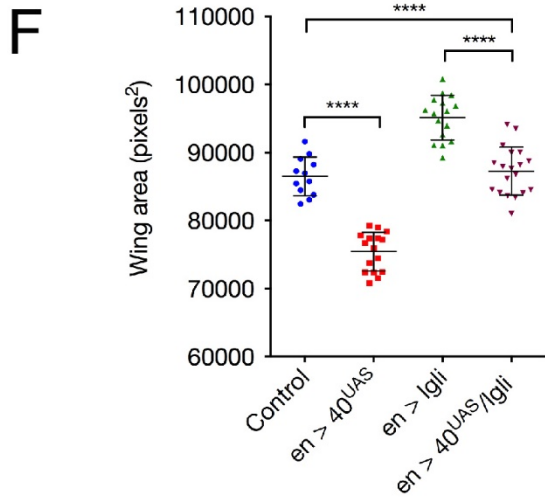

## Figure S2. Cell polarity phenotype modification by ectopic *tio* expression

(A - C') Adult female eye images side views, posterior to the left.

(D-E') Adult female flies dorsal view.

(A) Control (*GMR - GAL4*) adult eyes displaying highly organized, regular, lattice like organization of ommatidia to form the adult retina which is unaffected by ectopic *tio* expression (A')  $40^{UAS}$  (VDRC 60101).

(B) *GMR > crb<sup>intra</sup>* adult eyes are slightly larger and rougher than control eyes. (B') ectopic *tio* expression  $40^{UAS}$  (VDRC 60101) enhances the *GMR > crb<sup>intra</sup>* tissue overgrowth phenotype (arrowheads).

(C) *GMR > aPKC<sup>CA</sup>* adult eyes are smaller, areas of the retina show disruptions in retinal architecture and necrosis which is unaffected by ectopic *tio* expression (C')  $40^{UAS}$ .

(D) Adult female *en - GAL4*, note wings are held straight back in line with the anterior/posterior axis. (D') Ectopic expression of *tio* ( $40^{UAS}$ ) results in malformation of the hinge region (arrowhead), consequently the wings are held out and smaller.

(E) Adult female *en > lgli*, note wings are larger than control. (E') Ectopic expression of *tio* ( $40^{UAS}$ ) results in malformation of the hinge region (arrowhead), consequently the wings are held out and smaller than *en > lgli*.

(F) Quantification of total wing area (D - E'). Results represent individual wings  $\pm$  SD. \*\*\*\*p < 0.0001.

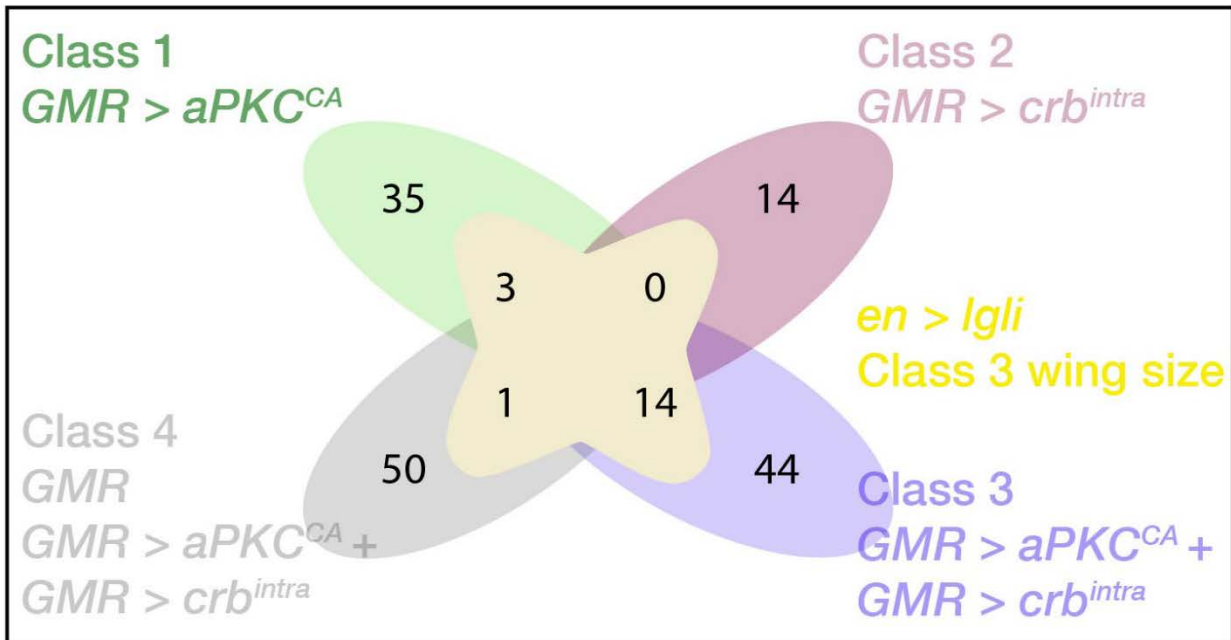

Parsons et al. Supp Figure S3

**Figure S3. Intersection of interacting genes from the  $en > lgli$  wing size Classes 3.1, 3.3 and 3.4 with modifiers from the  $GMR > aPKC^{CA}$  and  $GMR > crb^{intra}$**

Venn diagram depicting the number of modifier genes that interacted with the  $en > lgli$  wing size Class Classes 1 - 3 from the adult *Drosophila* cell polarity eye screen. Yellow shading denotes  $en > lgli$  modifiers, that showed greater modification than with  $en-GAL4$ . Green shading denotes Class 1,  $GMR > aPKC^{CA}$ . Pink shading denotes Class 2,  $GMR > crb^{intra}$ . Central region denotes Class 3.1, 3.3 and 3.4 genes that modified  $GMR > crb^{intra}$ ,  $GMR > aPKC^{CA}$ ,  $GMR > crb^{intra}$  and  $GMR > aPKC^{CA}$  or all three eye phenotypes.

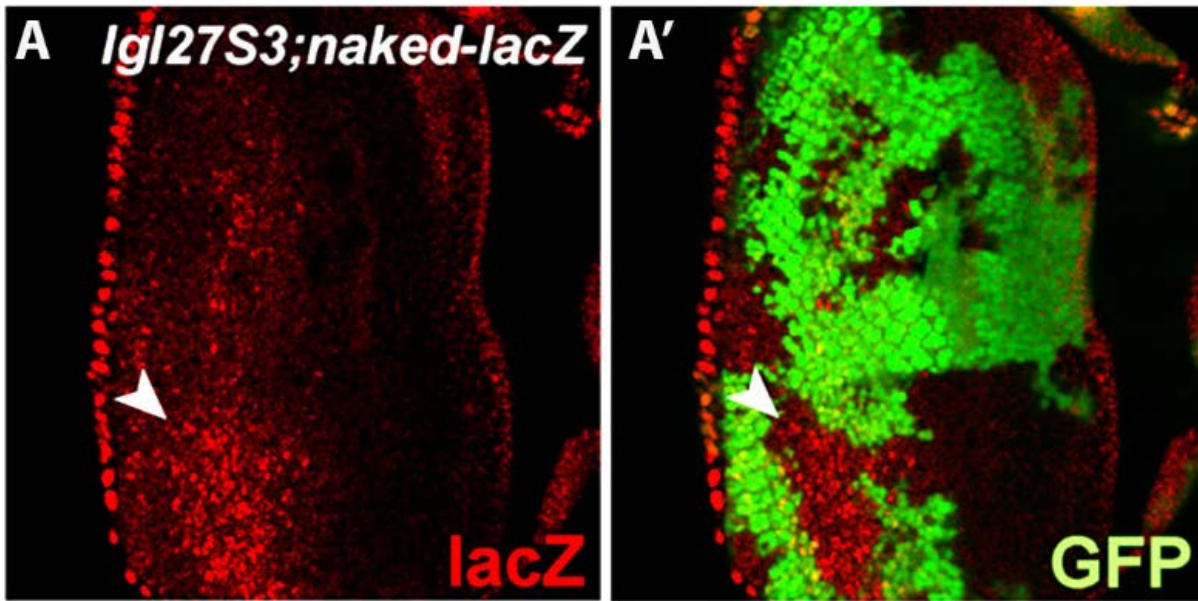

Parsons et al., Supp Figure S4

**Figure S4 Wnt signalling is upregulated in *lgl* mutant tissue**

(A and A') Planar section larval eye disc. Posterior is to the left. Nkd-lacZ is normally expressed in a gradient from the posterior to the anterior of the larval eye disc (Tyler and Baker, 2007). White arrowhead denotes *lgl*<sup>-/-</sup> mutant tissue with increased Nkd-β-galactosidase staining.

(A) *eyFLP; lgl<sup>27S3</sup>, FRT40/Ubi-GFP, FRT40; nkd-lacZ/+*. GFP<sup>+</sup> tissue is *wildtype*, GFP<sup>-</sup> is *lgl*<sup>-/-</sup> mutant tissue. β-gal staining reveals higher levels of *nkd-lacZ* reporter gene expression in *lgl*<sup>-/-</sup> tissue compared to *wildtype*.

(A') Overlay of GFP<sup>+</sup> tissue and β-gal staining confirms *lgl*<sup>-/-</sup> mutant tissue has higher levels of Wnt signalling than *wildtype* tissue.

## **SUPPLEMENTAL TABLES**



**Table S1. Classification of kinases and associated factors assayed in <sup>SEP</sup>*Drosophila* adult eye cell polarity modifier screens**

|                                                               |
|---------------------------------------------------------------|
| Tyrosine Kinase Like                                          |
| STE (Homologs of yeast STE7, STE11 and STE20 genes)           |
| Casein Kinase I                                               |
| Protein Kinase Like                                           |
| CMGC (Named after a set of families (CDK, MAPK, GS3K and CLK) |
| AGC (Named after Protein Kinase A, G and C families)          |
| Tyrosine Kinase                                               |
| Receptor Guanylate Cyclase                                    |
| Calcium and Calmodulin regulated Kinase                       |
| Atypical                                                      |
| Other                                                         |
| Unclassified (Diverse group of kinases and candidate kinases) |
| Kinase associated (Co factors such as cyclins)                |
| Non protein Kinase (Lipid and sugar kinases)                  |

| CG      | Gene     | Gene Name                        | Gene Group | Gene Family | Human ortholog(s)      | RNAi line |
|---------|----------|----------------------------------|------------|-------------|------------------------|-----------|
| CG10033 | DG2, for | foraging                         | AGC        | PKG         | PRKG1 PRKG2            | 38319     |
| CG10079 | Egfr     | Epidermal growth factor receptor | TK         | EGFR        | ERB2 ERB3 ERB4<br>EGFR | 107130    |

Parsons et al., Table S1

|         |          |                                               |                    |                         |                      |              |
|---------|----------|-----------------------------------------------|--------------------|-------------------------|----------------------|--------------|
| CG10082 |          |                                               | Non-Protein Kinase | Lipid Kinase            |                      | 103749 38326 |
| CG10177 |          |                                               | CAMK               | DCAMKL                  |                      | 107848 38349 |
| CG10244 | Cad96Ca  | Cadherin 96Ca                                 | TK                 |                         |                      | 1089         |
| CG10260 | PI4KIII0 | Phosphatidylinositol 4-kinase III<br>$\alpha$ | Non-Protein Kinase | Lipid Kinase            | PI4KA                | 105614       |
| CG10261 | aPKC     | atypical protein kinase C                     | AGC                | PROTEIN KINASE C FAMILY | PRKCI<br>PRKCZ       | 105624 2907  |
| CG10498 | cdc2c    | cdc2                                          | CMGC               | CDK                     | CDK16 CDK14<br>CDK18 | 104959       |
| CG10522 | sti      | sticky                                        | AGC                | DMPK                    | CIT                  | 10522R-1     |
| CG10539 | S6k      | RPS6-p70-protein kinase                       | AGC                | RSK                     | RPS6KB1              | 104369 18126 |
| CG10572 | Cdk8     | Cyclin-dependent kinase 8                     | CMGC               | CDK                     | CDK8 CDK19           | 107187 31264 |
| CG10579 | Eip63E   | Ecdysone-induced protein 63E                  | CMGC               | CDK                     | CDK14 CDK16<br>CDK18 | 106824       |



Parsons et al., Table S1

|         |        |                                |                   |              |                              |              |
|---------|--------|--------------------------------|-------------------|--------------|------------------------------|--------------|
| CG10637 | Nak    | Numb-associated kinase         | Other             | NAK<br>Bud32 | BMP2KL BMP2K<br>AAKI P53RK   | 35482        |
| CG10702 |        |                                | Kinase associated |              |                              | 100842 3691  |
| CG10776 | wit    | wishful thinking               | TKL               | STKR         | BMPR2 ACVR2A<br>TGFB2 ACVR2B | 103808       |
| CG10895 | lok    | loki                           | CAMK              | RAD53        | CHEK2                        | 44980 44981  |
| CG10917 | fj     | four jointed                   | Atypical          | FJXI         | FJXI                         | 6774         |
| CG10951 | niki   | nimA like kinase               | Other             | NEK          |                              | 100823       |
| CG10967 | Atgl   | Autophagy specific gene 1      | Other             | ULK          |                              | 16133        |
| CG1098  | Madm   | MLF1-adaptor molecule          | Other             | NRBP         | NRBP1<br>NRBP2               | 27346        |
| CG1099  | Dap160 | Dynamin associated protein 160 | Other             |              | ITSN1<br>ITSN2               | 16158        |
| CG1107  | aux    | auxillin                       | Other             | NAK          | DNAJCG<br>GAK                | 103426 16182 |

Parsons et al., Table S1

|         |         |                                          |                    |              |                           |              |
|---------|---------|------------------------------------------|--------------------|--------------|---------------------------|--------------|
| CG11221 |         |                                          | Other              | NKF-1        |                           | 100163 42947 |
| CG11228 | hpo     | hippo                                    | STE                | STE20        | STK3<br>STK4              | 104169       |
| CG11236 |         |                                          | Other              |              |                           | 38460        |
| CG11420 | png     | pan gu                                   | Other              |              |                           | 31500        |
| CG11486 |         |                                          | Kinase associated  |              | PAN3                      | 106497       |
| CG11489 | srpk79D | serine-arginine protein kinase<br>at 79D | CMCG               | SRPK         | SRPK1 SRPK2<br>SRPK3      | 102632       |
| CG11533 | Asator  | Asator                                   | CKI                | TTBK         | TTBK1<br>TTBK2            | 45120 45121  |
| CG11621 | Pi3K68D | Phosphatidylinositol 3 kinase<br>68D     | Non Protein Kinase | Lipid Kinase | IK3C2G PIK3C2A<br>PIK3C2B | 16239        |
| CG11660 |         |                                          | Atypical           | R10          | R10K1<br>R10K3            | 105395       |
| CG11859 |         |                                          | Atypical           | R10          | R10K2                     | 47401        |

Parsons et al., Table S1

|         |           |                                        |                   |      |                         |              |
|---------|-----------|----------------------------------------|-------------------|------|-------------------------|--------------|
| CG11870 | Emk       |                                        | STE               | STK  |                         | 10608816334  |
| CG12066 | Pka-C2    | cAMP-dependent protein kinase<br>2     | AGC               | PKA  | PRKACB                  | 30658        |
| CG12069 | PKA-like  |                                        | AGC               | PKA  |                         | 23719        |
| CG12072 | wts       | warts                                  | AGC               | NDR  | LATS1<br>LATS2          | 106174       |
| CG1210  | PdK1      | Phosphoinositide-dependent<br>kinase 1 | AGC               | PDK1 | PDK1<br>PDK2            | 18736        |
| CG12147 | CKIa-like |                                        | CKI               | CKI  |                         | 101875 31658 |
| CG1216  | mri       | mrityu                                 | Kinase associated |      | KCTD20<br>BTBD10        | 101345       |
| CG12170 |           |                                        | Other             |      | DXSM                    | 31672        |
| CG12244 | lic       | licorne                                | STE               | STE7 | MAP2K3 MAP2K4<br>MAP2K6 | 106822       |
| CG1227  | MPSK      |                                        | Other             | NAK  |                         | 105610 38647 |
| CG12306 | polo      | polo                                   | Other             | PLK  | PLK1 PLK2 PLK3          | 20177        |

Parsons et al., Table S1

|         |        |                             |          |       |                                                     |              |
|---------|--------|-----------------------------|----------|-------|-----------------------------------------------------|--------------|
| CG12559 | rl     | rolled                      | CMGC     | MAPK  | MAPK1 MAPK3                                         | 43123        |
| CG13591 | Ssl    | Suppressor of Stellate like | CMGC     |       | CSNK2B                                              | 17282        |
| CG1362  | cdc2rk | cdc2 related kinase         | CMGC     | CDK   | CDC2L2                                              | 100299 32249 |
| CG13688 | lpk2   | lpk2                        | PKL      | IPK   | IPMK                                                | 43824        |
| CG13850 | lpk2   | lpk2                        | PKL      | IPK   | IPMK                                                | 100863       |
| CG1389  | tor    | torso                       | Atypical | PIKK  |                                                     | 101154 1016  |
| CG14026 | tkv    | thickveins                  | TKL      | STKR  | ACVRI, BMPRIA,<br>ACVRIC, BMPRIB,<br>ACVRLI, ACVRIB | 105834 862   |
| CG14030 | Bub1   | Bub1 homologure             | Other    | BUB   | BUB1                                                | 101096       |
| CG14217 | Tao-1  | Tao                         | STE      | STE20 | TAOK1<br>TAOK2 TAOK3                                | 17432        |
| CG14226 | dome   | domeless                    | Other    |       |                                                     | 106071       |
| CG14305 |        |                             | CAMK     | TSSK  | TSSK1 TSSK2<br>TSSK3 TSSK4<br>TSSK6                 | 17477        |
| CG14396 | Ret    | Ret oncogene                | TK       | Ret   | RET FGFR1 FGFR2                                     | 107648       |

Parsons et al., Table S1

|         |              |                                               |       |              |                                                         |                    |
|---------|--------------|-----------------------------------------------|-------|--------------|---------------------------------------------------------|--------------------|
|         |              |                                               |       |              | FGFR4                                                   |                    |
| CGI4895 | Pak3         | Pak3                                          | STE   | STE20        | PAK1 PAK2 PAK3                                          | 107260             |
| CGI4903 |              |                                               | PTP   | ClassIII     | PTHRD1                                                  | 105752             |
| CGI495  | CaMKI        | Calcium/calmodulin-dependent protein kinase I | CAMK  | CAMKI        | PSKH2, CAMK4, CAMKID, CAMKID, PSKH1, PNCK, CAMKI        | 101380 1495R-1     |
| CGI4992 | Ack          | Activated Cdc42 kinase                        | TK    | Ack          | TNK1 TNK2                                               | 39857              |
| CGI5072 | SIK3         | Salt Inducible Kinase 3                       | CAMK  | CAMKL        | SIK1 SIK2 SIK3                                          | 39864              |
| CGI511  | Eph          | Eph receptor tyrosine kinase                  | TK    | Eph          | EPHB6, EPHB3, EPHA1, EPHA10, EPHA4, EPHB2, EPHA8, EPHA2 | 4771               |
| CGI5224 | Ckl1 $\beta$ | Casein kinase II beta subunit                 | CMGC  | CK2          | CSNK2B                                                  | 106845 32377 32378 |
| CGI578  |              |                                               | Other | UKI14 family | DPH6                                                    | 41599              |
| CGI5793 | Dsor1        | Downstream of raf1                            | STE   | STE7         | MAP2K1, MAP2K2                                          | 107276 40026       |

Parsons et al., Table S1

|         |        |                                           |                    |              |                            |                |
|---------|--------|-------------------------------------------|--------------------|--------------|----------------------------|----------------|
|         |        |                                           |                    |              |                            |                |
| CG1594  | hop    | hopscotch                                 | TK                 | Jak          |                            | 102830         |
| CG1609  | Gcn2   | Gcn2                                      | Other              | PEK          | EIFA2K4                    | 103976         |
| CG16708 | Cerk   | Ceramide Kinase                           | Non Protein Kinase | Lipid Kinase | CERK                       | 101550         |
| CG16910 | key    | Kenny                                     | Kinase associated  |              |                            | 100257         |
| CG16973 | msn    | misshapen                                 | STE                | STE20        | MINK1 MAP4K4<br>TNIK       | 16973R-1 (III) |
| CG17090 | HIPK   | homeodomain interacting<br>protein kinase | CMGC               | DYRK         | HIPK1 HIPK2<br>HIPK3       | 32854          |
| CG17161 | grp    | grapes                                    | CAMK               | CAMKL        | CHEK1                      | 12680          |
| CG17216 | KP78b  |                                           | CAMK               | STK          | MARK1 MARK2<br>MARK3 MARK4 | 105265 51995   |
| CG1725  | dlg1   | discs large 1                             | Kinase associated  | MAGUK        | DLG1 DLG2 DLG3<br>DLG4     | 41134 41136    |
| CG17256 | Nek2   | Nek2                                      | Other              | NEK          | NEK2 NEK6 NEK7             | 103408         |
| CG17299 | SNF4Ay | SNF4/AMP-activated protein                | PKL                | PIPK         | PRKAG1, PRKAG2,            | 17299R-1       |

Parsons et al., Table S1

|         |         |                                                   |          |          |                                                                |                 |
|---------|---------|---------------------------------------------------|----------|----------|----------------------------------------------------------------|-----------------|
|         |         | kinase gamma subunit                              |          |          | PRKAG3                                                         |                 |
| CGI7342 | MNK/LKG | MNK/LKG                                           | CAMK     | MAPKAPK  | MKNK2                                                          | 32885           |
| CGI7348 | drl     | Derailed                                          | TK       | Ryk like | AXL MERTK RYK<br>TYRO                                          | 100039          |
| CGI7520 | CKIIa   | casein kinase II $\alpha$                         | CMGC     | CK2      | CSNK2A1<br>CSNK2A2                                             | 17520R-2 (III)  |
| CGI7559 | dnt     | doughnut on 2                                     | TK       | Ryk like | AXL MERTK RYK<br>TYRO                                          | 106056          |
| CGI7596 | S6kII   | Ribosomal protein S6 kinase II                    | AGC      | RSK      | RPS6KA1<br>RPS6KA2<br>RPS6KA3<br>RPS6KA4<br>RPS6KA5<br>RPS6KA6 | 101451 5702     |
| CGI7603 | TafI    | TBP-associated factor I                           | Atypical | TAFI     | TAFI TAFIL                                                     | 106119          |
| CGI7698 | CAMKIIB |                                                   | Other    | CAMKK    | CAMKK1 CAMKK2<br>CDNK1B                                        | 105884<br>35632 |
| CGI7998 | Gprk2   | G protein-coupled receptor<br>kinase 2            | AGC      | GRK      | GRK4 GRK5 GRK6                                                 | 101463          |
| CGI8069 | CaMKII  | Calcium/calmodulin-dependent<br>protein kinase II | CAMK     | CAMK2    | CAMK2A<br>CAMK2B CAMK2D                                        | 38930           |



Parsons et al., Table S1

|         |              |                                 |                   |                    |                                             |                     |
|---------|--------------|---------------------------------|-------------------|--------------------|---------------------------------------------|---------------------|
|         |              |                                 |                   |                    | CAMK2G                                      |                     |
| CG18247 | shark        | SH2 ankyrin repeat kinase       | TK                | Syk                |                                             | 105706 25304        |
| CG18255 | Strn Mlck    | Stretchin-Mlck                  | CAMK              | MLCK               | MYLK MYLK2<br>MYLK3 MYLK4                   | 18255R-1 (III)      |
| CG1830  | PhK $\gamma$ | Phosphorylase kinase $\gamma$   | CAMK              | PHK                | PHK2                                        | 33054               |
| CG18402 | InsR         | Insulin-like receptor           | TK                | InsR               | IGFIR                                       | 991                 |
| CG1848  | LIMK1        | LIM-kinase1                     | TKL               | LISK               | LIMK1 LIMK2                                 | 25343               |
| CG18492 | Tak1         | TGF- $\beta$ activated kinase 1 | TKL               | MLK                | MAP3K7                                      | 101357 1388R-1 (II) |
| CG18582 | mbt          | mushroom bodies tiny            | STE               | STE20              | PAK4 PAK6 PAK7                              | 46043               |
| CG18604 | SIK3         | Salt Inducible Kinase 3         | STE               | STK                | SIK3                                        | 106268<br>20655     |
| CG18734 | Fur2         | Furin 2                         | Kinase associated | Peptidase 8        | FURIN PCSK1<br>PCSK2 PCSK4<br>PCSK5 PCSK6   | 101242              |
| CG18741 | DopR2        | Dopamine 1-like receptor 2      | Other             | DOPAMINE RECEPTORS |                                             | 105324              |
| CG1891  | Sax          | saxophone                       | TKL               | STKR               | ACVRI, BMPRIA,<br>ACVRIC, BMPRI8,<br>ACVRL1 | 42457               |

Parsons et al., Table S1

|        |        |                                            |                   |              |                                                 |         |
|--------|--------|--------------------------------------------|-------------------|--------------|-------------------------------------------------|---------|
| CG1951 |        |                                            | Other             | SCY1         | SCYL2                                           | 33431   |
| CG1954 | Pkc98E | Protein C kinase 98E                       | AGC               | PKC          | PRKCA PRKCB<br>PRKCE<br>PRKCG<br>PRKCH<br>PRKCO | 33434   |
| CG1973 | yata   | yata                                       | Other             | SCY1         | SCYL2                                           | 19275   |
| CG2028 | CKIa   | Casein kinase I $\alpha$                   | CKI               | CKI          | CSNK1A1, CSNK1D,<br>CSNK1A1L, CSNK1E            | 13664   |
| CG2048 | dco    | discs overgrown                            | CKI               | CKI          | CSNK1A1, CSNK1D,<br>CSNK1A1L, CSNK1E            | 9241    |
| CG2049 | PRK2   | PKN-related                                | AGC               | PKN          | PKN1 PKN2 PKN3                                  | 2055R-1 |
| CG2056 | c-SP33 | Serine Protease Immune Response Integrator | Kinase associated | Peptidase S1 | CELA3B<br>TPSG1.....>60                         | 107935  |
| CG2087 | PEK    | pancreatic eIF-2 $\alpha$ kinase           | Other             | PEK          | EIF2AK3                                         | 16427   |
| CG2210 | awd    | abnormal wing discs                        | Atypical          | NDK          | NME1 NME2 NME3<br>NME4                          | 33198   |

Parsons et al., Table S1

|         |           |                                       |                    |                            |                                                      |                 |
|---------|-----------|---------------------------------------|--------------------|----------------------------|------------------------------------------------------|-----------------|
| CG2252  | fs(l)h    | female sterile (l) homeotic           | Atypical           |                            | BRD2, BRD3,<br>BRDT, BRD4                            | 51227           |
| CG2272  | slpr      | slipper                               | TKL                | MLK                        | RP5-862P8.2,<br>MLTK, MAP3K9,<br>MAP3K10,<br>MAP3K11 | 106449          |
| CG2577  | CKIa-like |                                       | CKI                | CKI                        | CSNK1E, CSNK1A1,<br>CSNK1A1L, CSNK1D                 | 41693           |
| CG2929  | Pi4KII    | Pi4KIIa                               | PKL                | PIK                        | PI4K2A PI4K2B                                        | 25458           |
| CG30021 | metro     | menage a trois                        | Non Protein Kinase | Nucleic Acid Kinase        | MMP1 MMp2 MMp3<br>MMP4 MMP5<br>MMP7                  | 29965           |
| CG3008  |           |                                       | Atypical           | R1D                        | R1Dk1 R1Dk3                                          | 103828<br>52634 |
| CG30274 |           |                                       | Unclassified       | guanido phosphotransferase |                                                      | 33693           |
| CG30295 | lpkl      | lpkl                                  | PKL                |                            | IPPK                                                 | 29406           |
| CG30388 | Magi      |                                       | Unclassified       | guanylate kinase activity  | MAG1 MAG2 MAG3                                       | 41735           |
| CG3051  | SNFIA     | AMP-activated protein kinase          | CAMK               | CAMKL                      | PRKAA1 PRKAA2                                        | 1827            |
| CG3086  | MAPK-Ak2  | MAP kinase activated protein kinase-2 | CAMK               | MAPKAPK                    | MAPKAPK2<br>MAPKAPK3<br>MAPKAPK5                     | 3170            |

Parsons et al., Table S1

|         |         |              |                    |              |                                         |              |
|---------|---------|--------------|--------------------|--------------|-----------------------------------------|--------------|
| CG31003 | gskt    |              | CMGC               | GSK          | GSK3A GSK3B                             | 107429       |
| CG3105  | Pask    | PAS kinase   | CAMK               | CAMKL        | PASK                                    | 107025 25661 |
| CG31097 |         |              | Unclassified       |              | AGPHD1                                  | 107652       |
| CG31127 | Wsck    | Wsck         | TK                 |              |                                         | 1214         |
| CG31140 |         |              | Non Protein Kinase | Lipid Kinase | DGKQ                                    | 101347       |
| CG31183 |         |              | Kinase associated  |              | NPRI NPR2                               | 858          |
| CG31349 | pyd     | polychaetoid | Kinase associated  |              | TJPI TJP2 TJP3                          | 38863        |
| CG3135  | shf     | shifted      | Unclassified       | EGF like     | WIFIA                                   | 14803        |
| CG31421 | TAK1    | Tak1-like 1  | TLK                |              | MAP3K7                                  | 25760        |
| CG31431 |         |              | Unclassified       | IgG like     |                                         | 104697       |
| CG31643 | CG31643 |              | Atypical           |              | FASTKD1, TBRG4, FASTKD3, FASTK, FASTKD3 | 31643 R-1    |
| CG3172  | twf     | twinflin     | TK                 |              | TWF1 TWF2                               | 25817        |
| CG31873 |         |              | Non Protein Kinase | Lipid Kinase | FLJ10842                                | 105621       |

Parsons et al., Table S1

|         |           |                                       |                    |                           |                                   |               |
|---------|-----------|---------------------------------------|--------------------|---------------------------|-----------------------------------|---------------|
| CG32019 | bt        | bent                                  | CAMK               |                           | MYLK MYLK2<br>MYLK3 MYLK4         | 46252         |
| CG32134 | btI       | breathless                            | TK                 |                           | RET<br>FGFR1 FGFR2<br>FGFR3 FGFR4 | 947           |
| CG3216  |           |                                       | RGC                | RGC                       | NPR1<br>NPR2                      | 107985        |
| CG32417 | MytI      | MytI                                  | AGC                |                           | PKMYT1                            | 105157        |
| CG32484 | Sk2       | Sphingosine kinase 2                  | Non Protein Kinase | Lipid Kinase              |                                   | 101018        |
| CG32703 | ERK7      | Extracellularly regulated kinase<br>7 | CMGC               |                           | MAPK15                            | 2309R-1 (III) |
| CG32717 | sdt       |                                       | Unclassified       | guanylate kinase activity | MMP1<br>MMP2 MMMP3<br>CASK        | 100685        |
| CG32742 | I(1)G0148 |                                       | Other              |                           | CDC7                              | 104902        |
| CG32743 | nonC      | no-on-and-no-off transient C          | PKL                |                           | SMG1                              | 4549 R-1      |

Parsons et al., Table S1

|         |          |                                                                   |                    |                                       |                                |                         |
|---------|----------|-------------------------------------------------------------------|--------------------|---------------------------------------|--------------------------------|-------------------------|
| CG3277  |          |                                                                   | TK                 | VEGFR                                 |                                | 108052                  |
| CG32944 |          |                                                                   | CAMK               |                                       | STK32A STK32B<br>STK32C        | 103642<br>10532R-1 (II) |
| CG3319  | Cdk7     | Cyclin-dependent kinase 7                                         | CMGC               | CDK                                   | CDK7 CDK20                     | 103413                  |
| CG3324  | Pkg2ID   | ZID                                                               | AGC                | PKG                                   |                                | 103513 34594            |
| CG33338 | p38c     | P38c                                                              | CMGC               | MAPK                                  | MAPK11 MAPK12<br>MAPK13 MAPK14 | 105173                  |
| CG33519 | Unc-89   | Unc-89                                                            | Unclassified       |                                       |                                | 106267                  |
| CG33554 | Nipped-A | Nipped-A                                                          | Atypical           | PIKK                                  | TRRAP                          | 2905 R-3                |
| CG33671 |          |                                                                   | Non Protein Kinase | Carbohydrate Kinase                   | MVK                            | 49772                   |
| CG3400  | Pfrx     | 6-phosphofructo-2-kinase                                          | Non Protein Kinase | Carbohydrate Kinase                   | PFKFB1 PFKFB2<br>PFKFB3 PFKFB4 | 25958                   |
| CG34123 | Trpm     | Transient receptor potential cation channel, subfamily M ortholog | Other              | Transient receptor potential channels | TRPM1<br>TRPM3<br>TRPM6 TRPM7  | 107537                  |
| CG34344 | rdgA     | retinal degeneration A                                            | Non Protein Kinase | Lipid Kinase                          | DGKZ DGKZ1                     | 103806                  |
| CG34357 |          |                                                                   | RGC                |                                       | NPRI NPR2                      | 105185                  |
| CG34359 | IP3K2    | Inositol 1,4,5-triphosphate                                       | Non Protein Kinase | Lipid Kinase                          | ITPK1                          | 102772                  |

Parsons et al., Table S1

|         |          |                                |                    |               |                                     |              |
|---------|----------|--------------------------------|--------------------|---------------|-------------------------------------|--------------|
|         |          | kinase 2                       |                    |               |                                     |              |
| CG34361 | Dgk      | Diacyl glycerol kinase         | Non Protein Kinase | Lipid Kinase  | DGKA DGKB DGKG                      | 105753       |
| CG34380 |          |                                | TK                 |               | DDR1 DDR2                           | 31640 R-1    |
| CG34384 |          |                                | Non Protein Kinase | Lipid Kinase  | DGKD DGKH                           | 102481       |
| CG34412 | tlk      |                                | Other              |               | TLK1<br>TLK2                        | 105732 46425 |
| CG3608  |          |                                | Atypical           | ABC1          | ADCK1                               | 106695       |
| CG3682  | PIP5K59B | PIP5K59B                       | PKL                |               | PSMD4 PIP5K1A<br>PIP5K1B<br>PIP5K1C | 47027        |
| CG3724  | Pgd      | Phosphogluconate dehydrogenase | Other              | dehydrogenase | PGD                                 | 100269       |
| CG3837  |          |                                | Kinase Associated  |               |                                     | 105549       |
| CG3915  | Drl-2    | derailed 2                     | TK                 | Ryk           | AXL MERTK RYK<br>TYRO3              | 102192       |
| CG3969  | Ack-like | Activated Cdc42 kinase-like    | TK                 |               |                                     | 100169       |
| CG4007  | Nrk      | Neurospecific receptor kinase  | TK                 | Musk          | MUSK1 ROR1 ROR2                     | 103804       |



Parsons et al., Table S1

|        |         |                                 |          |       |                                   |              |
|--------|---------|---------------------------------|----------|-------|-----------------------------------|--------------|
| CG4012 | Gek     | Genghis Kahn                    | AGC      | DMPK  | CDC42BPA<br>CDC42BPB<br>CDC42BPG  | 28367        |
| CG4041 |         |                                 | Other    | TBCK  | TBCK                              | 34780        |
| CG4141 | PI3K92E | PI3K92E                         | PKL      |       | PIK3CA PIK3CB<br>PIK3CD<br>PIK3CG | 38986        |
| CG4252 | mei-4l  | meiotic 4l                      | Atypical | PIKK  | ATR                               | 103624 11251 |
| CG4268 | Pitslre | Pitslre                         | CMGC     | CDK   | CDC2L2                            | 107303       |
| CG4290 | SIK2    | Salt Inducible Kinase 2         | CAMK     | CAMKL | SIK1 SIK2 SIK3                    | 103739 26496 |
| CG4379 | Pka-C1  | cAMP-dependent protein kinase 1 | AGC      | PKA   | PRKACA PRKACB<br>PRKACG PRKX      | 101524       |
| CG4488 | wee     | wee                             | Other    | WEE   | WEE1 WEE2                         | 106329       |
| CG4523 | dPINK1  | PTEN-induced putative kinase 1  | Other    | NKF2  | PINK1                             | 21860        |
| CG4527 | slik    | Sterile20-like kinase           | STE      | STE20 | STK10                             | 43783        |
| CG4551 | smi35A  | smell impaired 35A              | CMGC     | DYRK  | DYRK1A<br>DYRK1B<br>DYRK2         | 101376       |

Parsons et al., Table S1

|        |        |                                           |          |       |                     |              |
|--------|--------|-------------------------------------------|----------|-------|---------------------|--------------|
|        |        |                                           |          |       | DYRK3 DYRK4         |              |
| CG4583 | Ire-1  | Inositol-requiring enzyme-1               | Other    | IRE   | ERN1 ERN2           | 39561        |
| CG4629 |        |                                           | CAMK     | CAMKL | NIM1                | 26574        |
| CG4803 | Tak12  | Tak1-like 2                               | TKL      | MLK   | MAP3K7              | 104701       |
| CG4839 |        |                                           | AGC      | PKG   | PRKG1 PRKG2         | 100999 26641 |
| CG4926 | Ror    | Ror                                       | TK       | Ror   | ROR1 ROR2 MUSK      | 932          |
| CG4945 |        |                                           | Other    | NFK1  |                     | 24683        |
| CG4965 |        |                                           | Other    | NFK1  |                     | 104147 46064 |
| CG5072 | Cdk4   | Cyclin-dependent kinase 4                 | CMGC     | CDK1  | CDK4 CDK6           | 40576        |
| CG5092 | Tor    | Target of rapamycin                       | Atypical | PIKK  | MTOR                | 5092R-2      |
| CG5125 | ninaC  | neither inactivation nor afterpotential C | STE      | STE20 |                     | 27359        |
| CG5169 | GckIII | Germinal centre kinase III                | STE      | STE20 | MST4 STK24<br>STK25 | 107158 49558 |
| CG5179 | Cdk9   | Cyclin-dependent kinase 9                 | CMGC     | CDK   | CDK4 CDK6           | 103561 30448 |
| CG5182 | PK34A  | PK34A                                     | CMGC     | GSK   |                     | 101146 27368 |
| CG5363 | cdc2   | cdc2                                      | CMGC     | CDK   | CDK1 CDK2 CDK3      | 106130 41838 |

Parsons et al., Table S1

|        |         |                                     |                    |                     |                      |              |
|--------|---------|-------------------------------------|--------------------|---------------------|----------------------|--------------|
| CG5373 | Pi3K59F | Phosphatidylinositol 3 kinase 59F   | Non Protein Kinase | Lipid Kinase        | PI3KC3               | 100296       |
| CG5387 | Cdk5a   | Cdk5 activator-like protein         | Kinase Associated  |                     | CDK5R1               | 34990        |
| CG5408 | trbl    | tribbles                            | CAMK               | Trbl                | TRIB1 TRIB2 TRIB3    | 106774       |
| CG5475 | Mpk2    | Mpk2                                | CMGC               | MAPK                | MAPK9 MAPK10         | 52277        |
| CG5483 | Lrrk    | Leucine-rich repeat kinase          | TKL                | LRRK                | LRRK1 LRRK2          | 105630       |
| CG5680 | bsk     | basket                              | CMGC               | MAPK                | MAPK9 MAPK10         | 34138        |
| CG5725 | fbl     | fumble                              | Non Protein Kinase | Lipid Kinase        | PANK1<br>PANK2 PANK3 | 101437       |
| CG5757 |         |                                     | Non Protein Kinase | Nucleic Acid Kinase | DYMK                 | 27504        |
| CG5790 |         |                                     | Other              | CDC7                | CDC7                 | 45045        |
| CG5974 | pll     | pelle                               | TKL                | IRAK                | IRAK2                | 103774       |
| CG6027 | cdi     | center divider                      | TKL                | LISK                | TESK1                | 43633        |
| CG6114 | Sad     | synapses of amphids defective       | CAMK               | CAMKL               | BRSK1<br>BRSK2       | 100717 22225 |
| CG6214 | MRP     | Multidrug-Resistance like Protein 1 | Kinase Associated  |                     | ABCC1<br>ABCC2 ABCC3 | 105419       |

Parsons et al., Table S1

|        |       |                                   |      |      |                                           |             |
|--------|-------|-----------------------------------|------|------|-------------------------------------------|-------------|
|        |       |                                   |      |      | ABCC4                                     |             |
| CG6292 | CycT  | cyclinT                           | CMGC | CDK  | CCNT1 CCNT2                               | 103387      |
| CG6297 | JIL-1 | JIL-1                             | AGC  | RSK  | RPS6KA1 to RPS6KA6                        | 107001      |
| CG6355 | fab1  | fab2                              | PKL  |      | PIKFYVE                                   | 27591       |
| CG6386 | ball  | ballchen                          | CKI  | VRK  | VRK1<br>VRK2<br>VRK3                      | 48980       |
| CG6498 | dop   | drop out                          | AGC  | MASR | MAST1<br>MAST2<br>MAST3<br>MAST4          | 35101       |
| CG6518 | inaC  | no inactivation after potential C | AGC  | PKC  | PRKCA<br>PRKCB<br>PRKCE<br>PRKCH<br>PRCKQ | 101719 2895 |

Parsons et al., Table S1

|        |        |                          |                   |       |                                              |                 |
|--------|--------|--------------------------|-------------------|-------|----------------------------------------------|-----------------|
| CG6535 | tefu   | telomerase fusion        | Atypical          | PIKK  | ATM                                          | 22502           |
| CG6551 | fu     | fused                    | Other             | ULK   | STK36                                        | 27662           |
| CG6620 | ial    | IplII-aurora-like kinase | Other             | AUR   | AURKA AURKB<br>AURKC                         | 104051          |
| CG6622 | Pkc53E | Protein C Kinase 53E     | AGC               | PKC   | PRKCA PRKCB<br>PRKCE PRKCG<br>PRKCH<br>PRKCO | 27696           |
| CG6703 | CASK   | CASK ortholog            | CAMK              | MAGUK |                                              | 104793 34184    |
| CG6715 | KP78A  | KP78A                    | CAMK              | CAMKL | MARK1 MARK2<br>MARK3 MARK4                   | 51616           |
| CG6772 | Slob   | Slowpoke binding protein | Other             | Slob  |                                              | 100987          |
| CG6800 |        |                          | CMGC              | CDK   | CDK7 CDK20                                   | 104255          |
| CG6875 | asp    | abnormal spindle         | Kinase Associated |       | ASPM                                         | 2910            |
| CG6963 | gish.  | gilgamesh                | CKI               | CKI   | CSNK1G1<br>CSNK1G2<br>CSNK1G3                | 106826<br>26003 |
| CG7001 | S6KL   | S6 Kinase Like           | AGC               | RSKR  |                                              | 102179          |

Parsons et al., Table S1

|        |      |                                   |                   |       |                                      |               |
|--------|------|-----------------------------------|-------------------|-------|--------------------------------------|---------------|
| CG7004 | fwd  | four wheel drive                  | PKL               |       | PIK4B                                | 27785         |
| CG7028 | PRP4 | PRP4                              | CMGC              | DYRK  | PRPF4B                               | 107042 27808  |
| CG7094 |      |                                   | CKI               | CKI   | CSNK1A1 CSNK1A1L<br>CSNK1D<br>CSNK1E | 27843         |
| CG7097 | hppy | happyhour                         | STE               | STE20 | MAP4K1 MAP4K2<br>MAP4K3 MAP4K5       | 103580 35166  |
| CG7125 | PKD  | Protein Kinase D                  | CAMK              | PKD   | PRKD1 PRKD2<br>PRKD3                 | 106255        |
| CG7156 |      |                                   | AGC               | RSKL  |                                      | 26035         |
| CG7177 | Wnk  | WNK homolog                       | Other             | WNK   | WNK1 WNK2 WNK3<br>WNK4               | 106928        |
| CG7186 | Sak  | SAK Kinase                        | Other             | PLK   | PLK4                                 | 105102        |
| CG7207 | cert | ceramide transfer protein         | Kinase Associated |       | COL4A3BP                             | 103563        |
| CG7223 | htl  | heartless                         | TK                | FGF   | FGFR2                                | 6692          |
| CG7393 | p38b | p38b                              | CMGC              | MAPK  | MAPK11                               | 7393R-3 (III) |
| CG7497 |      |                                   | Other             |       |                                      | 106421 9374   |
| CG7525 | Tie  | Tie like receptor tyrosine kinase | TK                |       | TIE1                                 | 26879         |

Parsons et al., Table S1

|        |        |                          |                    |              |                                           |                       |
|--------|--------|--------------------------|--------------------|--------------|-------------------------------------------|-----------------------|
| CG7597 | Cdk12  | Cdk12                    | CGMC               | Cdk          | Cdk9 Cdk12 Cdk13                          | 25508                 |
| CG7616 |        |                          | Atypical           | ABC1         | ADCK5                                     | 104663                |
| CG7643 | ald    | altered disjunction      | Other              | TTK          | TTK                                       | 7643 R-1              |
| CG7693 | fray   | frayed                   | STE                | STE20        | DXSRI                                     | 106919 7693-R-2 (III) |
| CG7717 | Mekkl  | Mekkl                    | STE                | STE11        | MAP3K4                                    | 25528                 |
| CG7719 | gwl    | greatwall                | AGC                | MAST         | MASTL                                     | 21046                 |
| CG7838 | BubR1  | Bub related kinase       | Other              | BUB          | BUB1B                                     | 26109                 |
| CG7873 | Src42A | Src oncogene at 42       | TK                 | Src          | HCK LCK<br>FRK SRC BLK YES<br>FGR FYN LYN | 100708                |
| CG7892 | nmo    | nemo                     | CMGC               | MAAPK        | NLK                                       | 101545 3002           |
| CG7904 | put    | punt                     | TKL                | STKR         | ACVR2A ACVR2B<br>BMPR2 TGFBR2             | 107071 37279          |
| CG8049 | Btk29A | Btk kinase family at 29A | TK                 | Tec          | BMX BTX ITK TEC<br>TXK                    | 106962                |
| CG8057 | alc    | alcorn                   | Non Protein Kinase | Lipid Kinase | GK GK2                                    | 104489                |
| CG8173 |        |                          | Other              | TOPK         | PBK                                       | 35845                 |



Parsons et al., Table S1

|        |            |                                |                   |       |                                                 |                         |
|--------|------------|--------------------------------|-------------------|-------|-------------------------------------------------|-------------------------|
| CG8174 | SRPK       | SRPK                           | CMGC              | SRPK  | SRPK1 SRPK2<br>SRPK3                            | 26933                   |
| CG8201 | par1       | par1                           | CAMK              | CAMKL | MARK1 MARK2<br>MARK3 MARK4                      | 52556                   |
| CG8203 | Cdk5       | Cyclin dependent kinase 5      | CMGC              | CDK   | CDK5                                            | 104491 35855            |
| CG8222 | Pvr        | PDGF and VEGF receptor related | TK                | VEGFR | VEGFR1 VEGFR2<br>VEGFR3                         | 105353 976              |
| CG8224 | babo       | baboon                         | TKL               | STKR  | ACR1 ACRIB<br>ACVR1C<br>ACVRL1<br>BMPRIA BMPRIB | 106092 853              |
| CG8250 | Alk        | Alk                            | TK                | ALK   | ALK LTK ROS1                                    | 107083                  |
| CG8351 | Tcp-1-etal | Tcp-1-etal                     | Kinase Associated |       | CCT7                                            | 28895                   |
| CG8485 |            |                                | CAMK              | CAMKL | SNRK                                            | 35939                   |
| CG8565 |            |                                | CMGC              | SRPK  | SRPK1 SRPK2<br>SRPK3                            | 100449<br>8565R-2 (III) |
| CG8637 | trc        | tricornered                    | AGC               | NDR   | STK38                                           | 107923<br>35988         |

Parsons et al., Table S1

|        |           |                             |                    |                       |                                   |                 |
|--------|-----------|-----------------------------|--------------------|-----------------------|-----------------------------------|-----------------|
| CG8657 | Dgk       | Diacy glycerol kinase       | Non Protein Kinase | Lipid Kinase          |                                   | 4659            |
| CG8726 |           |                             | Other              | Slob                  | PXK                               | 40719           |
| CG8742 | Gyc76C    | Guanylyl cyclase at 76C     | Other              | Putative Pseudokinase | NPR1 NPR2                         | 106525          |
| CG8767 | mos       | mos                         | Other              | MOS                   | MOS                               | 36531           |
| CG8789 | wnd       | wallenda                    | TKL                | MLK                   | MAP3K12<br>MAP3K13                | 103410          |
| CG8866 |           |                             | Other              | ULK                   | ULK3                              | 103725          |
| CG8874 | Fps85D    | Fps oncogene analog         | TK                 | Fer                   | FER                               | 107266<br>36053 |
| CG8878 |           |                             | CKI                | VRK                   |                                   | 100985<br>28970 |
| CG8914 | Ckl1beta2 | Caesin kinase II b2 subunit | CMGC               |                       | CSNK2B                            | 102633 26915    |
| CG8967 | otk       | off track                   | TK                 | CCK4                  | PTK7                              | 104688          |
| CG9222 |           |                             | CAMK               | TSSK                  | TSSK1B<br>TSSK2<br>TSSK4<br>TSSK6 | 104259          |

Parsons et al., Table S1

|        |       |                     |                    |              |                                  |             |
|--------|-------|---------------------|--------------------|--------------|----------------------------------|-------------|
| CG9358 | Phk-3 | Pherokine           | Non Protein Kinase | Lipid Kinase |                                  | 106938      |
| CG9738 | Mkk4  | MAP kinase kinase 4 | STE                | STE7         | MAP2K3 MAP2K4<br>MAP2K6          | 26929       |
| CG9774 | rok   | Rho kinase          | AGC                | DMPK         | ROCK1 ROCK2                      | 3793        |
| CG9962 |       |                     | CKI                | CKI          |                                  | 36473       |
| CG9985 | sktl  | skittles            | PKL                |              | PIP5KIA PIP5KIB<br>PIP5KIC PSMD4 | 101624 6229 |

Kinases and kinase-associated factors assayed in *Drosophila* adult eye cell polarity modifier screens (sorted by CG number) encoding either kinases or associated factors for which *UAS*-controlled inverted repeat strains were tested. Kinase group and family are indicated (see color-coded chart below), as well as human orthologs. RNAi line refers to VDRC number and those numbers denoted with R were obtained from NIG (see *Drosophila* stocks, Materials and Methods for further information).

**Table S2. Classification of phosphatases and phosphatase-associated factors assayed in <sup>SEP</sup>*Drosophila* adult eye cell polarity modifier screens**

|                                                                                    |
|------------------------------------------------------------------------------------|
| Phosphoprotein Phosphatase (PPP)                                                   |
| Protein Phosphatase Mg <sup>+</sup> /Mn <sup>+</sup> dependent (PPM)               |
| Classical Protein Tyrosine Phosphatase                                             |
| Class I/Dual Specificity Phosphatase (DSP)                                         |
| Class III protein Tyrosine Phosphatase                                             |
| Factor IIF interacting CTD<br>Phosphatase/Small CTD phosphatase                    |
| Haloacid Dehalogenase like Hydrolase                                               |
| Unclassified                                                                       |
| Phosphatase associated (Co factors such as subunits of<br>multi component PPtases) |
| Non protein phosphatase (Lipid or sugar phosphatases)                              |

| CG      | Gene | Gene Name              | Gene Group | Gene Family | Human ortholog(s) | RNAi line    |
|---------|------|------------------------|------------|-------------|-------------------|--------------|
| CG10089 |      |                        | PTP        | Class I/DSP | DUSP15 DUSP22     | 17991        |
| CG10138 | PpD5 | Protein phosphatase D5 | STP        | PPP         |                   | 104452       |
| CG10371 | Plip | PTEN-like phosphatase  | PTP        | CLASSICAL   | PTPMT1            | 104774       |
| CG10376 | PP2C |                        | STP        | PPM         | PPMIF<br>PPMIE    | 101335 35473 |
| CG10417 |      |                        | STP        | PPM         | PPMIG             | 106180       |

Parsons et al., Table S2

|         |              |                                                  |                         |                   |                        |              |
|---------|--------------|--------------------------------------------------|-------------------------|-------------------|------------------------|--------------|
| CG10426 |              |                                                  | Non Protein Phosphatase | Lipid Phosphatase | INPP5E                 | 16048        |
| CG10443 | Lar          | Leukocyte-antigen-related-like                   | Phosphatase             | CLASSICAL         | PTPRS PTPRD PTPRF      | 107996       |
| CG10493 | dPHLPP /PP2C | H domain leucine-rich repeat protein phosphatase | STP                     | PPM               | PHLPP1, PHLPP2         | 16057        |
| CG10930 | PpY-55A      | Protein phosphatase Y at 55A                     | STP                     | PPP               |                        | 102021 16096 |
| CG10975 | Ptp69D       | Protein tyrosine phosphatase 69D                 | PTP                     | CLASSICAL         | PTPRG PTPRZI           | 104761       |
| CG11217 | CanB2        | Calcineurin B2                                   | STP                     | PPP               | PPP3R1 PPP3R2 ,WDR92   | 104370       |
| CG11425 |              |                                                  | Non Protein Phosphatase | Lipid Phosphatase | PPAP2C PPAP2B PPAP2A   | 103037       |
| CG11426 |              |                                                  | Non Protein Phosphatase | Lipid Phosphatase | PPAP2C, PPAP2B, PPAP2A | 42599        |
| CG11437 |              |                                                  | Non Protein Phosphatase | Lipid Phosphatase | PPAP2C, PPAP2B, PPAP2A | 9452         |
| CG11438 |              |                                                  | Non Protein Phosphatase | Lipid Phosphatase | PPAP2C, PPAP2B, PPAP2A | 11438 R-3    |
| CG11440 | laza         |                                                  | Non Protein Phosphatase | Lipid Phosphatase | PPAP2C, PPAP2B, PPAP2A | 42592        |
| CG11516 | Ptp99A       | Protein tyrosine phosphatase 99A                 | PTP                     | CLASSICAL         | PTPRG PTPRZI           | 103457       |

Parsons et al., Table S2

|         |          |                                    |                                                  |                        |                              |              |
|---------|----------|------------------------------------|--------------------------------------------------|------------------------|------------------------------|--------------|
|         |          |                                    |                                                  |                        |                              |              |
| CG11597 | PP4-like |                                    | STP                                              | PPP                    |                              | 104729 38541 |
| CG12078 |          |                                    | Asp based catalysis                              | HAD                    |                              | 101274       |
| CG12091 |          |                                    | STP                                              | PPM                    | PPTC7                        | 100800       |
| CG12151 | Pdp      | Pyruvate dehydrogenase phosphatase | STP                                              | PPM                    |                              | 107271       |
| CG12169 | Ppml     | Ppml                               | STP                                              | PPP                    |                              | 101257       |
| CG12217 | PpV      | Protein phosphatase V              | STP                                              | PPP                    | PPP2CA PPP2CB<br>PPP4C PPP6C | 101997       |
| CG12252 | Fcpl     |                                    | Asp based catalysis                              | FCP/SCP                |                              | 106253       |
| CG1228  | Ptpmeg   | ptpmeg                             | PTP                                              | CLASSICAL              | PTPN3, PTPN4                 | 103740       |
| CG12746 |          |                                    | Non Protein Phosphatase                          | Lipid Phosphatase      |                              | 104989       |
| CG13197 |          |                                    | PTP                                              | Class I/DSP            | DUSP11                       | 105122       |
| CG13311 |          |                                    | Phosphatase associated                           | Phosphatase associated |                              | 101655       |
| CG1395  | stg      | string                             | PTP                                              | Class I/DSP            | CDC25A CDC25B                | 17760        |
| CG14211 | MKP-4    | MAPK Phosphatase 4                 | PTP                                              | Class I/DSP            | DUSP12                       | 104884       |
| CG14212 |          |                                    | ?                                                | HAD                    | PHOSPHO1<br>PHOSPHO2         | 104555       |
| CG14216 | Ssu71    | Ssu72 CTD phosphatase              | UNCLASSIFIED<br>SERINE/THREONINE<br>PHOSPHATASES | RNA pol II phosphatase | SSU72                        | 104388       |
| CG14297 |          |                                    | PTP                                              | Class III              |                              | 102071       |
| CG14411 |          |                                    | PTP                                              | Class I/DSP            | MTMR0 MTMR11<br>MTMR12       | 17576        |

Parsons et al., Table S2

|         |          |                                     |                                                      |                   |                      |              |
|---------|----------|-------------------------------------|------------------------------------------------------|-------------------|----------------------|--------------|
|         |          |                                     |                                                      |                   |                      |              |
| CG1455  | CanA1    | Calcineurin A1                      | STP                                                  | PPP               | PPP3CB PPP3CC        | 32283        |
| CG15528 |          |                                     | PTP                                                  | ClassI/DSP        | DUSP14, DUSP21       | 105484       |
| CG15743 |          |                                     | Non Protein Phosphatase                              | Lipid Phosphatase |                      | 42685        |
| CG15771 |          |                                     | HALOACID DEHALOGENASE<br>NON-PROTEIN<br>PHOSPHATASES | HAD               | NANP                 | 106331       |
| CG15912 |          |                                     | HALOACID DEHALOGENASE<br>NON-PROTEIN<br>PHOSPHATASES | HAD               | HDHD3                | 100777       |
| CG1696  | Dd       | Dullard                             | Asp based catalysis                                  | FCP/SCP           | CTDNEP1              | 104785       |
| CG17026 |          |                                     | Non Protein Phosphatase                              | Lipid Phosphatase | IMPA1 IMPA2          | 32813        |
| CG17027 |          |                                     | Non Protein Phosphatase                              | Lipid Phosphatase | IMPA1 IMPA2          | 103270       |
| CG17028 |          |                                     | Non Protein Phosphatase                              | Lipid Phosphatase | IMPA1 IMPA2          | 100100       |
| CG17029 |          |                                     | Non Protein Phosphatase                              | Lipid Phosphatase | IMPA1 IMPA2          | 32822        |
| CG17291 | Pp2A-29B | Protein phosphatase 2A at 29B       | STP                                                  | PPM               | PPMIH PPMIJ<br>PPMIM | 49671        |
| CG17598 |          |                                     | STP                                                  | PPM               | PPMIH PPMIJ<br>PPMIM | 32955        |
| CG17746 |          |                                     | STP                                                  | PPM               |                      | 100178       |
| CG1817  | Ptp10D   | Protein tyrosine phosphatase<br>10D | PTP                                                  | CLASSICAL         | PTPRB PTPRJ PTPRO    | 1101         |
| CG18243 | Ptp52F   | Ptp52F                              | PTP                                                  | CLASSICAL         |                      | 3116         |
| CG1906  | alph     | alphabet                            | STP                                                  | PPM               | PPMIA PPMIB          | 105483 32476 |
| CG2096  | flw      | flapwing                            | STP                                                  | PPP               | PPPICA PPPICB        | 104677       |

Parsons et al., Table S2

|         |           |                                                        |                         |                          |                         |               |
|---------|-----------|--------------------------------------------------------|-------------------------|--------------------------|-------------------------|---------------|
|         |           |                                                        |                         |                          | PPP1CC                  |               |
| CG2890  | PPP4-R2   | Protein phosphatase 4 STP regulatory subunit 2-related | STP                     | PPP                      | PPP4R2                  | 25445         |
| CG2984  | Pp2C1     | Protein phosphatase 2C                                 | STP                     | PPM                      | PP2CM                   | 105249        |
| CG3028  | lpp       | inositol polyphosphate 1-phosphatase                   | Non Protein Phosphatase | Lipid Phosphatase        | INPPI                   | 25615         |
| CG31692 | fbp       | fructose-1,6-bisphosphatase                            | Non Protein Phosphatase | Carbohydrate Phosphatase | FBP1 FBP2               | 21396         |
| CG31795 | ia2       | ia2 ortholog                                           | PTP                     | CLASSICAL                | PTPRN PTPRN2            | 7560          |
| CG3200  | Reg-2     |                                                        | HAD                     | HAD                      | HDHD3                   | 107185        |
| CG32156 | Mbs       | Myosin binding subunit                                 | STP                     | PPP                      | PP1R12A PP1R12B         | 105762        |
| CG3245  | PpN58A    | Protein phosphatase N at 58A                           | STP                     | PPP                      | PP2CA PP2CB PPP4C PPP6C | 102060        |
| CG32505 | PP4-19C   | Protein phosphatase 19C                                | STP                     | PPP                      | PP2CA PP2CB PPP4C PPP6C | 25317         |
| CG32697 | I(1)G0232 |                                                        | PTP                     | CLASSICAL                | PTPN9                   | 104427        |
| CG32812 |           |                                                        | STP                     | PPP                      |                         | 104081        |
| CG33747 | primo 2   | primo 2                                                | PTP                     | ClassIII                 | ACP2                    | 50642         |
| CG34099 | Mkp       | MAP kinase-specific phosphatase                        | PTP                     | ClassI/DSP               | DUSP19                  | 104374        |
| CG3530  |           |                                                        | PTP                     | ClassI/DSP               | MTM6 MTM7 MTM8          | 26216         |
| CG3573  | Ocrl      | Oculocerebrorenal syndrome of Lowe ortholog            | Non Protein Phosphatase | Lipid Phosphatase        | OCRL INPB5B             | 34649         |
| CG3632  |           |                                                        | PTP                     | ClassI/DSP               | MTM3 MTM4               | 3632R-3 (III) |
| CG3705  | aay       | astray                                                 | Asp based catalysis     | HAD                      | PSPH                    | 23179         |
| CG3954  | csw       | corkscrew                                              | PTP                     | CLASSICAL                | PTPN6 PTPN11            | 21756         |
| CG4123  | Mippl     | Multiple inositol polyphosphate                        | Non protein phosphatase | Lipid Phosphatase        |                         | 101634        |



Parsons et al., Table S2

|        |          |                                               |                         |                   |                                       |                 |
|--------|----------|-----------------------------------------------|-------------------------|-------------------|---------------------------------------|-----------------|
|        |          | phosphatase 1                                 |                         |                   |                                       |                 |
| CG4209 | CanB     | Calcineurin B                                 | STP                     | PPP               | PPP3R1 PPP3R2<br>WDR92                | 21611           |
| CG4317 | Mipp2    | Multiple inositol polyphosphate phosphatase 2 | Non Protein Phosphatase | Lipid Phosphatase |                                       | 108018          |
| CG4993 | PRL-1    | PRL-1                                         | PTP                     | ClassI/DSP        |                                       | 107836          |
| CG5026 |          |                                               | PTP                     | ClassI/DSP        | MTMR9                                 | 105674 34915    |
| CG5565 |          |                                               | HAD                     | HAD               | PUDP                                  | 100396          |
| CG5643 | wdb      | widerborst                                    | STP                     | PPP               | PPP2R5A<br>PPP2R5C PPP2R5D<br>PPP2R5E | 101406          |
| CG5671 | Pten     | Pten                                          | PTP                     | ClassI/DSP        | PTEN TPTE TPTE2                       | 101475          |
| CG5830 |          |                                               | Asp based catalysis     | FCP/PCP           | CTDSP1<br>CTDSP2<br>CTDSPL            | 101539          |
| CG6036 |          |                                               | STP                     | PPM               | PPM1A PPM1B                           | 105568          |
| CG6235 | tws      | twins                                         | STP                     | PPP               | PPP2CA PPP2CB<br>PPP4C PPP6C          | 104167          |
| CG6238 | ssh      | slingshot                                     | PTP                     | ClassI/DSP        | SSH1<br>SSH2<br>SSH3                  | 107998 6238 R-4 |
| CG6562 | synj     | synaptojanin                                  | Non Protein Phosphatase | Lipid Phosphatase | SYNJI<br>SYNJ2                        | 46070           |
| CG6571 | rdgC     | retinal degeneration C                        | STP                     | PPP               | PPEF1<br>PPEF2                        | 35105           |
| CG6593 | Ppla 96a | Protein phosphatase 1 $\alpha$ at 96A         | STP                     | PPP               | PPP1CA PPP1CB<br>PPP1CC               | 105525          |

Parsons et al., Table S2

|        |          |                                                                  |                         |                   |                                              |              |
|--------|----------|------------------------------------------------------------------|-------------------------|-------------------|----------------------------------------------|--------------|
| CG6697 | Ublcp1   | Ubiquitin-like domain-containing C-terminal domain phosphatase 1 | HAD                     | HAD               |                                              | 27719        |
| CG6805 |          |                                                                  | Non Protein Phosphatase | Lipid Phosphatase | INPP5J INPP5K                                | 107728       |
| CG6899 | Ptp4E    | Protein tyrosine phosphatase 4E                                  | PTP                     | CLASSICAL         |                                              | 1012         |
| CG7109 | MTS/PP2A | microtubule star                                                 | STP                     | PPP               | PPP2CA<br>PPP2CB<br>PPP4C PPP6C              | 35171        |
| CG7115 | PP2C     |                                                                  | STP                     | PPP               | PPMIL                                        | 103354 9404  |
| CG7180 |          |                                                                  | PTP                     | CLASSICAL         | PTPRK                                        | 102397       |
| CG7378 |          |                                                                  | PTP                     | ClassI/DSP        | DUSP1<br>DUSP3<br>DUSP13<br>DUSP26<br>DUSP27 | 106098       |
| CG7850 | puc      | puckered                                                         | PTP                     | ClassI/DSP        | DUSP10                                       | 3018         |
| CG8402 | PpD3     | Protein phosphatase 3                                            | STP                     | PPP               | PPP5C                                        | 107386 24308 |
| CG8584 |          |                                                                  | Asp based catalysis     | FCO/SCP           |                                              | 107849       |
| CG8804 | wun      | wunen                                                            | Non Protein Phosphatase | Lipid Phosphatase | PPAP2A PPAP2B<br>PPAP2C                      | 6446         |
| CG8805 | wun2     | wunen                                                            | Non Protein Phosphatase | Lipid Phosphatase | PPAP2A PPAP2B<br>PPAP2C                      | 103452 4176  |
| CG8822 | PpD6     | Protein phosphatase 6                                            | STP                     | PPP               | PPP1CA PPP1CB<br>PPP1CC                      | 104211 36047 |
| CG9115 | mtm      | myotubularin                                                     | PTP                     | ClassI/DSP        | MTM1<br>MTMR1 MTMR2                          | 29032        |
| CG9128 | Sac1     | Sac1                                                             | Non Protein Phosphatase | Lipid Phosphatase | SACMIL                                       | 37216        |

Parsons et al., Table S2

|        |          |                                                      |                         |                        |                         |                               |
|--------|----------|------------------------------------------------------|-------------------------|------------------------|-------------------------|-------------------------------|
| CG9151 | acj6     | abnormal chemosensory jump 6                         | ss                      | Phosphatase associated | CIB1 CIB2 CIB4          | 105292                        |
| CG9156 | Ppl-13C  | Protein phosphatase at 13C                           | STP                     | PPP                    | PPPICA PPPICB<br>PPPICC | 9156-R1 (II)                  |
| CG9181 | Ptp61F   | Protein tyrosine phosphatase<br>61F                  | PTP                     | CLASSICAL              | PTPN1 PTPN2             | 37436                         |
| CG9311 | mop      | myopic                                               | PTP                     | CLASSICAL              | PTPN23                  | 104860                        |
| CG9351 | fifi     | falafel                                              | STP                     | PPP                    | SMEK1 SMEK2             | 24143                         |
| CG9389 |          |                                                      | Non Protein Phosphatase | Lipid Phosphatase      | IMPA1                   | 44663                         |
| CG9391 |          |                                                      | Non Protein Phosphatase | Lipid Phosphatase      | IMPA1 IMPA2             | 23723                         |
| CG9493 | Pez      | Pez                                                  | PTP                     | CLASSICAL              | PTPN14                  | 40743                         |
| CG9554 | eya      | eyes absent                                          | Asp based catalysis     | HAD                    | EYA1 EYA2 EYA3 EYA4     | 108071                        |
| CG9578 | Tip41    |                                                      |                         | Phosphatase Associated | TIPRL                   | 9578-R3 (II)<br>9578-R4 (III) |
| CG9784 |          |                                                      | Non Protein Phosphatase | Lipid Phosphatase      |                         | 30098                         |
| CG9819 | CanA-14F | Calicneurin A at 14F                                 | STP                     | PPP                    |                         | 30105                         |
| CG9842 | Pp2B-14D | Protein phosphatase 2B at 14D                        | STP                     | PPP                    | PPP3CB PPP3CC           | 103144 46873                  |
| CG9856 | PTP-ER   | Protein tyrosine phosphatase<br>ERK/Enhancer of Ras1 | PTP                     | Class/DSP              |                         | 9856 R-1                      |

Phosphatases and phosphatase-associated factors assayed in *Drosophila* adult eye cell polarity modifier screens (sorted by CG number) encoding either phosphatases or associated factors for which *UAS*-controlled inverted repeat strains were tested. Phosphatase group and family is indicated (see color-coded chart). PTP and STP refer to Protein Tyrosine or Serine/Threonine Phosphatases respectively, as well as human orthologs. RNAi line refers to VDRC number and those numbers denoted with R were obtained from NIG (see *Drosophila* stocks, Materials and Methods for further information).

Table S3. Gene list of *GMR > crb<sup>intra</sup>*, *GMR > aPKC<sup>CA</sup>* and *GMR* modifiers

| CG Number        | VORC or<br>NIG Number | Gene       | <i>GMR-gal4</i> | <i>GMR&gt;crb<sup>intra</sup></i> | <i>GMR&gt;aPKC<sup>CA</sup></i> |
|------------------|-----------------------|------------|-----------------|-----------------------------------|---------------------------------|
| <b>CLASS ONE</b> |                       |            |                 |                                   |                                 |
| CG9856           | 9856 R-1              | PTP-ER     | NE              | NE                                | small, glassy                   |
| CG9222           | 104259                |            | NE              | NE                                | NE (larger?)                    |
| CG8657           | 4659                  | Dgk        | NE              | NE                                | small, glassy                   |
| CG8402           | 107386                | PpD3       | NE              | NE                                | more necrotic                   |
| CG8351           | 28895                 | Tcp-1-etal | NE              | NE                                | small, glassy                   |
| CG8049           | 106962                | Btk29A     | NE              | NE                                | less necrotic                   |
| CG7892           | 101545                | nmo        | NE              | NE                                | larger, glassy                  |
| CG7643           | 7643 R-1              | ald        | NE              | NE                                | smaller, necrotic               |
| CG7497           | 106421                |            | NE              | NE                                | more necrotic                   |
| CG7186           | 105102                | SAK        | NE              | NE                                | less necrotic                   |
| CG7028           | 107042                | PRP4       | NE              | NE                                | smaller                         |
| CG6697           | 27719                 | Ublcpl     | NE              | NE                                | less necrotic                   |

Parsons et al., Table S3

|         |                    |              |    |    |                            |
|---------|--------------------|--------------|----|----|----------------------------|
| CG6518  | 2895               | inaC         | NE | NE | more necrotic              |
| CG6355  | 27591              | fabI         | NE | NE | smaller, less necrotic     |
| CG6297  | 107001             | JIL-1        | NE | NE | less necrotic              |
| CG6036  | 105568             |              | NE | NE | less necrotic              |
| CG5680  | 34138 <sup>i</sup> | bsk          | NE | NE | more necrotic              |
| CG5483  | 105630             | lrrk         | NE | NE | less necrotic              |
| CG5408  | 106774             | trbl         | NE | NE | larger?                    |
| CG4926  | 932                | Ror          | NE | NE | glassy, less necrotic      |
| CG4839  | 26641              | PRKG-like    | NE | NE | more necrotic              |
| CG4803  | 104701             | Tak2         | NE | NE | small, glassy              |
| CG4209  | 21611              | CanB         | NE | NE | less necrotic              |
| CG4141  | 38985              | DP110 - PI3K | NE | NE | enhanced, smaller          |
| CG4141  | 2902               | DP110 - PI3K | NE | NE | enhanced, smaller          |
| CG33554 | 2905 R-3           | Nipped-A     | NE | NE | small, glassy              |
| CG33519 | 106267             | Unc-89       | NE | NE | smaller, necrotic          |
| CG32743 | 4549 R-1           | Smg1         | NE | NE | smaller, strongly necrotic |
| CG32717 | 100685             | sdt          | NE | NE | more necrotic              |
| CG31873 | 105621             | Mulk         | NE | NE | less necrotic              |
| CG31349 | 38863              | pyd          | NE | NE | less necrotic              |

Parsons et al., Table S3

|                  |         |             |    |                      |                         |
|------------------|---------|-------------|----|----------------------|-------------------------|
| CG2845           | 20909   | D-Raf - Phl | NE | NE                   | enhanced, smaller       |
| CG2577           | 41693   | CKIa-like   | NE | NE                   | undulated @18°C         |
| CG2096           | 104677  | flw         | NE | NE                   | small, glassy, necrotic |
| CG1696           | 104785  | Dd          | NE | NE                   | more necrotic           |
| CG13197          | 105122  |             | NE | NE                   | less necrotic           |
| CG12559          | 43123   | rl          | NE | NE                   | small, glassy           |
| CG11870          | 16334   | Emk         | NE | NE                   | glassy, less necrotic   |
| CG11621          | 16239   | Pi3K68D     | NE | NE                   | slightly larger         |
| CG10930          | 102021  | PpY-55A     | NE | NE                   | small, necrotic         |
| CG10702          | 100842  |             | NE | NE                   | more necrotic           |
| CG10572          | 107187  | Cdk8        | NE | NE                   | less necrotic           |
| CG10371          | 104774  | Plip        | NE | NE                   | less necrotic           |
| CG10138          | 104452  | PpD5        | NE | NE                   | more necrotic           |
| <b>CLASS TWO</b> |         |             |    |                      |                         |
| CG9774           | 3793    | Ppml        | NE | glassy, ruffled edge | NE                      |
| CG9578           | 9578-R4 | Reg-2       | NE | glassy, ruffled edge | NE                      |

Parsons et al., Table S3

|         |        |           |    |                                       |    |
|---------|--------|-----------|----|---------------------------------------|----|
| CG8914  | 102633 |           | NE | glassy, ruffled edge                  | NE |
| CG8866  | 103725 | p38c      | NE | glassy, ruffled edge                  | NE |
| CG33338 | 105173 |           | NE | glassy, ruffled edge                  | NE |
| CG32484 | 101018 | Sk2       | NE | glassy, ruffled edge                  | NE |
| CG3200  | 107185 |           | NE | glassy, ruffled edge                  | NE |
| CG1830  | 33054  | PhKy      | NE | glassy, ruffled edge                  | NE |
| CG17216 | 105265 | KP78b     | NE | S, less rough                         | NE |
| CG15793 | 107276 |           | NE | glassy, ruffled edge                  | NE |
| CG1389  | 1016   | Dsorf     | NE | S, narrower                           | NE |
| CG13850 | 100863 | CKIa-like | NE | bulgy, glassy edge                    | NE |
| CG12169 | 101257 | CKIa-like | NE | undulated posterior                   | NE |
| CG12147 | 101875 |           | NE | Fem - mildly ruffled edge, males - NE | NE |
| CG12147 | 31658  |           | NE | mildly rougher                        | NE |
| CG12091 | 100800 | Tip41     | NE | roughness, few necrotic ommatidia     | NE |
| CG11489 | 102632 |           | NE | bulgy, glassy edge, smaller?          | NE |
| CG10417 | 106180 |           | NE | slightly overgrown, folded            | NE |
| CG10082 | 103749 |           | NE | mildly smaller / glassier             | NE |

Parsons et al., Table S3

CLASS THREE

|        |        |          |    |                                    |                                            |
|--------|--------|----------|----|------------------------------------|--------------------------------------------|
| CG9784 | 30098  |          | NE | folded, necrotic                   | smaller, necrotic                          |
| CG8967 | 104688 | otk      | NE | glassy, ruffled edge               | more necrotic                              |
| CG8878 | 100985 |          | NE | S, narrower                        | small, glassy, necrotic                    |
| CG8878 | 28970  |          | NE | glassier edges, mildly depigmented | smaller, more necrotic / rescued @18°C     |
| CG8874 | 107266 | Fps85D   | NE | less rough                         | small, necrotic                            |
| CG8805 | 4176   | wun2     | NE | NE                                 | small, glassy, necrotic.                   |
| CG8805 | 103452 | wun2     | NE | glassy, ruffled edge               | NE                                         |
| CG8485 | 35939  | SAP/SNRK | NE | slightly glassy around edges       | smaller                                    |
| CG8224 | 853    | babo     | NE | narrower                           | smaller                                    |
| CG7693 | 106919 | fray     | NE | less rough                         | small, necrotic                            |
| CG7597 | 25508  |          | NE | folded, necrotic                   | more necrotic, semi lethal                 |
| CG7378 | 106098 |          | NE | bulgy, glassy edge                 | more necrotic                              |
| CG7125 | 106255 | PKD      | NE | S, less rough                      | small, glassy                              |
| CG7115 | 103354 |          | NE | glassy, ruffled edge               | more necrotic                              |
| CG7097 | 103580 | hppy     | NE | glassy, ruffled edge               | more necrotic, larger                      |
| CG7097 | 35166  | hppy     | NE | slightly glassy edges              | enhanced, stronger / mildly glassier @18°C |
| CG6963 | 106826 | gish     | NE | bulgy, glassy edge                 | less necrotic                              |



Parsons et al., Table S3

|        |          |         |    |                                |                              |
|--------|----------|---------|----|--------------------------------|------------------------------|
| CG6963 | 26003    | gish    | NE | NE                             | glassier                     |
| CG6703 | 34184    | CASK    | NE | mildly undulated posterior     | undulated @18°C              |
| CG6703 | 104793   | CASK    | NE | glassy, ruffled edge           | NE                           |
| CG6620 | 104051   | ial     | NE | S, narrower                    | small, glassy                |
| CG6238 | 6238 R-4 | ssh     | NE | depigmented, larger            | small, glassy                |
| CG6114 | 100717   |         | NE | glassy, ruffled edge           | more necrotic                |
| CG5974 | 103774   | pll     | NE | bulgy, glassy, ruffled edge    | pupal lethal                 |
| CG5725 | 101437   | fbl     | NE | glassy, ruffled edge           | more necrotic                |
| CG5671 | 101475   | Pten    | NE | glassy, ruffled edge, necrotic | more necrotic, larger (?)    |
| CG5643 | 101406   | wdb     | NE | glassy, larger                 | more necrotic                |
| CG5565 | 100396   |         | NE | glassy, ruffled edge           | more necrotic                |
| CG5387 | 34990    | Cdk5    | NE | small, glassy                  | smaller                      |
| CG5373 | 100296   | Pi3K59F | NE | glassy, ruffled edge           | more necrotic                |
| CG5182 | 101146   | Pk34A   | NE | glassy edge, smaller           | small, glassy, necrotic      |
| CG5182 | 27368    | Pk34A   | NE | NE                             | more necrotic                |
| CG5179 | 103561   | Cdk9    | NE | lethal                         | small, necrotic, semi lethal |
| CG5179 | 30448    | Cdk9    | NE | pupal lethal                   | pupal lethal                 |
| CG4379 | 101524   | Pka-C1  | NE | glassy, ruffled edge, necrotic | more necrotic, smaller       |

Parsons et al., Table S3

|         |         |         |    |                                     |                                 |
|---------|---------|---------|----|-------------------------------------|---------------------------------|
| CG4268  | 107303  | Pitslre | NE | glassy, ruffled edge                | more necrotic                   |
| CG3915  | 102192  | Drl-2   | NE | ruffled edge, mildly bulgy          | more necrotic                   |
| CG3837  | 105549  |         | NE | glassy, ruffled edge                | Larger, less necrotic           |
| CG34384 | 102481  |         | NE | glassy, ruffled edge                | more necrotic                   |
| CG34357 | 105185  |         | NE | less rough                          | more necrotic                   |
| CG31127 | 1214    | WscK    | NE | folded, overgrown                   | more necrotic                   |
| CG30021 | 29965   | skf     | NE | less rough                          | glassy, less necrotic           |
| CG2890  | 25445   | PPP4-R2 | NE | glassy                              | glassier, but not necrotic      |
| CG2048  | 9241    | dco     | NE | ruffled edge                        | small, glassy                   |
| CG1906  | 105483  | alph    | NE | glassy, ruffled edge                | small, necrotic                 |
| CG18604 | 20655   |         | NE | ruffled edge & eye                  | more necrotic / glassy @18°C    |
| CG18582 | 46043   | mbt     | NE | smaller, glassy edge                | smaller, glassy                 |
| CG18492 | 101357  | TakI    | NE | less rough                          | Larger                          |
| CG18492 | 1388R-1 | TakI    | NE | few necrotic ommatidia              | almost normal @18°C             |
| CG17698 | 105884  |         | NE | bulgy, glassy edge                  | more necrotic, larger           |
| CG17348 | 100039  | drl     | NE | glassy, ruffled edge                | more necrotic                   |
| CG17256 | 103408  | Nek2    | NE | glassy, ruffled edge                | more necrotic                   |
| CG17090 | 32854   | HIPK    | NE | smaller, glassier at posterior edge | smaller, glassy @ 18°C and 25°C |

Parsons et al., Table S3

|         |           |        |    |                                |                                 |
|---------|-----------|--------|----|--------------------------------|---------------------------------|
| CG16910 | 100257    | key    | NE | glassy, ruffled edge           | more necrotic                   |
| CG1594  | 102830    | hop    | NE | glassy, ruffled edge           | more necrotic                   |
| CG15224 | 106845    | CklI   | NE | glassy, ruffled edge, necrotic | more necrotic, smaller          |
| CG15072 | 39864     | SIK3   | NE | undulated posterior            | small, glassy @18°C             |
| CG14895 | 107260    | Pak3   | NE | glassy, ruffled edge, necrotic | more necrotic, smaller          |
| CG14217 | 17432     | Tao-1  | NE | undulated posterior            | more necrotic / undulated @18°C |
| CG14212 | 104555    |        | NE | glassy, ruffled edge           | small, glassy, necrotic         |
| CG14026 | 105834    | tkv    | NE | small, glassy                  | pupal pharate lethal            |
| CG12306 | 20177     | POLO   | NE | glassy posterior               | smaller, glassy @18°C           |
| CG12244 | 106822    | lic    | NE | glassy, ruffled edge           | more necrotic                   |
| CG11516 | 103457    | Ptp99A | NE | glassy, ruffled edge, necrotic | larger, glassy, mildly necrotic |
| CG11217 | 104370    | CanB2  | NE | glassy, ruffled edge           | more necrotic / larger?         |
| CG1107  | 103426    | aux    | NE | necrotic, folded               | small, necrotic                 |
| CG1107  | 16182     | aux    | NE | small, glassy                  | smaller                         |
| CG10975 | 104761    | Ptp69D | NE | glassy, ruffled edge           | less necrotic                   |
| CG10522 | 10522 R-1 | sti    | NE | narrower                       | small, glassy, bit necrotic     |
| CG10443 | 107996    | Lar    | NE | glassy, ruffled edge           | larger, necrotic                |
| CG10295 | 12553     | PAKI   | NE | bulgy posterior                | enhanced, smaller               |

Parsons et al., Table S3

|                   |        |                |                               |    |                       |                            |
|-------------------|--------|----------------|-------------------------------|----|-----------------------|----------------------------|
| CG10261           | 105624 | aPKC           |                               | NE | less rough            | near perfect rescue        |
| CG10261           | 2907   | aPKC           |                               | NE | S, mild suppression   | strong suppression         |
| CG10260           | 105614 |                |                               | NE | glassy, ruffled edge  | more necrotic              |
| CG7850            | 3018   | puc            |                               | NE | narrower, semi lethal | eye ablated, semi lethal   |
| CG4290            | 103739 | SIK2           |                               | NE | narrower, glassy      | small, glassy              |
| CG2984            | 105249 | Pp2Cl          |                               | NE | glassy, ruffled edge  | smaller, more necrotic     |
| CG11660           | 105395 |                |                               | NE | small, glassy         | small, glassy              |
| CG1227            | 105610 |                |                               | NE | small, glassy         | pupal lethal               |
| CG14903           | 105752 |                |                               | NE | glassy, ruffled edge  | more necrotic              |
| CG10579           | 106824 | Eip63E         |                               | NE | smaller, glassy edge  | small, glassy              |
| CG8637            | 107923 | trc            |                               | NE | glassy, ruffled edge  | small, glassy              |
| CG8637            | 35988  | trc            |                               | NE | mildly rougher        | NE                         |
| <b>CLASS FOUR</b> |        |                |                               |    |                       |                            |
| CG9985            | 101624 | skt1           | males only - necrotic patches |    | narrower, glassy      | small, glassy, semi lethal |
| CG9842            | 46873  | PP2B, Ppl2-14D |                               |    | mildly rough          | NE                         |
| CG9554            | 108071 | eya            |                               |    | glassy                | smaller, strongly necrotic |
| CG9493            | 40743  | Pez            |                               |    | smaller, rough        | small, glassy              |
|                   |        |                |                               |    |                       | pupal lethal, no eyes      |

Parsons et al., Table S3

|         |         |                   |                              |                        |                                  |
|---------|---------|-------------------|------------------------------|------------------------|----------------------------------|
| CG9351  | 24143   | Ffl (PP4 subunit) | glassy                       | glassier               | Smaller, bulgy, glassy           |
| CG9311  | 104860  |                   | mildly glassy                | glassy, ruffled edge   | more necrotic                    |
| CG9156  | 9156-RI | PPI-13C           | rough, necrotic, semi-lethal | pupal lethal           | pupal lethal                     |
| CG8822  | 36047   | PPI-like, PpD6    | mildly rough                 | rougher                | semi lethal, rougher             |
| CG8222  | 105353  | PPI-like, PpD6    | smaller / mildly glassy      | small, glassy          | small, glassy, semi lethal       |
| CG8222  | 976     | PPI-like, PpD6    | necrotic                     | folded, necrotic       | more necrotic                    |
| *CG7904 | 107071  | punt              | smaller, glassy edge         | smaller, glassy edge   | pupal lethal                     |
| *CG7904 | 37279   | punt              | NE                           | glassy, narrower       | smaller, glassier                |
| CG7873  | 100708  | Src42A            | smaller, rough               | less rough             | NE                               |
| CG7177  | 106928  |                   | smaller                      | narrower               | small, glassy                    |
| CG7004  | 27785   | fwd               | bulgy, glassy                | bulgy, glassy          | pharate lethal                   |
| CG6593  | 105525  | Ppl               | pharate lethal (eye open)    | pupal lethal           | pupal lethal                     |
| CG6292  | 103387  | CycT              | pharate lethal, no eye       | pharate lethal         | pharate lethal                   |
| CG5363  | 106130  | cdc2              | mildly narrower & rough      | narrower               | small, glassy                    |
| CG5363  | 41838   | cdc2              | mildly rough                 | less rough             | less necrotic                    |
| CG5169  | 107158  | GckIII            | smaller, mildly glassy       | glassy                 | glassy, less necrotic            |
| CG4527  | 43783   | Slik              | slightly depigmented         | glassy, slightly bulgy | enhanced, smaller, more necrotic |
| CG4317  | 108018  | Mipp2             | slightly depigmented & bulgy | glassy, ruffled edge   | NE                               |
| CG34412 | 105732  | tlk               | glassy                       | glassy                 | smaller, more necrotic           |

Parsons et al., Table S3

|         |          |                    |                             |                                  |                               |
|---------|----------|--------------------|-----------------------------|----------------------------------|-------------------------------|
| CG3324  | 34594    | Pkg21D             | smaller, rough              | smaller, rough                   | pupal lethal                  |
| CG32697 | 104427   | I(1)G0232          | rough, slightly bulgy       | glassy, ruffled edge             | small, glassy                 |
| CG32505 | 25317    | PP4-19C            | glassy                      | glassy, blistered                | rougher, necrotic, not glassy |
| CG32156 | 105762   | Mbs                | rougher, larger             | glassy, larger                   | glassy, necrotic              |
| *CG2615 | 2615R-1  | IKK-eR-1           | NE                          | mildly rough                     | slightly smaller              |
| *CG2615 | 2615R-2  | IKK-eR-2           | mildly rough                | mildly rough, bulgy, black spots | slightly smaller              |
| CG2252  | 51227    | fs(l)h             | glassy, depigmented edge    | pharate lethal                   | small, necrotic               |
| CG2049  | 2055R-1  | PRK2 (PKN-related) | glassy                      | reduced eye, semi-pupal-lethal   | reduced eye, pupal-lethal     |
| CG2028  | 13664    | Ckl                | smaller / glazed            | narrower                         | small, glassy, semi lethal    |
| CG1891  | 42457    | Sax                | mildly rough                | rougher                          | less necrotic                 |
| CG18402 | 991      | InR                | normal but smaller          | less rough                       | small, glassy                 |
| CG17746 | 100178   |                    | mildly rough, bulgy         | glassy, bulgy                    | more glassy                   |
| CG17603 | 106119   | TafI               | depigmented, slightly rough | bulgy, larger, scars             | larger, less necrotic         |
| CG17342 | 32885    | MNK/LK6            | mildly rough                | glassy, mildly undulated         | stronger rough                |
| CG17291 | 49671    | Pp2A-29B           | mildly glassy               | ruffled edge                     | more necrotic, semi lethal    |
| *CG1725 | 41134    | dlg1               | almost no eye               | almost no eye                    | pupal lethal, no eyes         |
| *CG1725 | 41136    | dlg1               | NE                          | overgrown, necrotic              | more necrotic, semi lethal    |
| CG16973 | 16973R-1 | msn                | glassy, rough               | smaller, undulated               | smaller, undulated            |
| CG1609  | 103976   | Gcn2               | smaller, glassy             | narrower, glassy                 | small, glassy                 |

Parsons et al., Table S3

|          |        |          |                                 |                                 |                                              |
|----------|--------|----------|---------------------------------|---------------------------------|----------------------------------------------|
| CG14992  | 39857  | Ack      | smaller, rougher                | small, glassy                   | smaller, glassy                              |
| CG1455   | 32283  | CanAI    | pharate lethal                  | pharate lethal                  | pharate lethal                               |
| CG14211  | 104884 | MKP-4    | mildly rough                    | smaller, glassy edge            | pupal lethal                                 |
| CG1395   | 17760  | stg      | mildly rough                    | less rough                      | small, glassy                                |
| CG12217  | 101997 | PpV      | glassy posterior, triangular    | glassy, ruffled edge            | small, glassy                                |
| CG1210   | 18736  | Pk61C    | normal but smaller              | smaller                         | small, glassy                                |
| CG12072  | 106174 | wt5      | strongly overgrown              | overgrown, semi lethal          | larger, more necrotic                        |
| CG11597  | 38541  | PP4-like | normal pattern, but no bristles | same roughness, but no bristles | glassier / mild rescue, no bristles @ 18°C   |
| CG11486  | 106497 |          | smaller, glassy                 | smaller, glassy edge            | pupal lethal                                 |
| CG11228  | 104169 | hpo      | rough, mildly larger            | mildly bulgy                    | larger, more necrotic                        |
| *CG11221 | 100163 | PKN      | NE                              | glassy, ruffled edge            | NE                                           |
| *CG11221 | 42947  | PKN      | mildly rough, depigmented       | mildly folded & overgrown       | more necrotic@25°C; folded, necrotic@18°C    |
| CG10539  | 104369 | SGK      | slightly smaller                | smaller                         | smaller                                      |
| CG10498  | 104959 | cdc2c    | smaller, glassy                 | small, glassy                   | smaller, glassy                              |
| CG10079  | 107130 | Egfr     | pharate lethal, no eye left     | pupal lethal                    | pupal lethal                                 |
| CG10033  | 38319  | DG2, for | glassy                          | glassy, narrower                | semi lethal@25°C; reduced, narrow eyes @18°C |

i \* NIG numbers end in R, NE no effect

\* Modifier genes classified based on strongest RNAi line phenotype

---

Results and brief description of adult female eye phenotypes observed for the 185 genes that modified  $GMR > crb^{intra}$  and/or  $GMR > aPKC^{CA}$ . A variety of  $GMR > crb^{intra}$  and/or  $GMR > aPKC^{CA}$  modified phenotypes were observed including; increased or decreased necrosis, increased growth scored as ‘bulginess’ or ‘folding’, decreased growth described as ‘narrowness’ or small and depigmented or glassy eyes. Gene lists organized by Class. Genes ordered in accordance to CG number, highest to lowest. All interactions are at 25°C unless stated otherwise.



**Table S4** Gene list of *en* > *lgli* modifiers

| RNAi line      | CG     | Gene       | <i>en</i> > <i>lgli</i>        | <i>en</i> > <i>GFP</i> |
|----------------|--------|------------|--------------------------------|------------------------|
| <b>CLASS 1</b> |        |            |                                |                        |
| <b>Lethal</b>  |        |            |                                |                        |
| 101624 6229    | CG9985 | skt1       | lethal                         | lethal                 |
| 40743          | CG9493 | Pez        | lethal                         | decreased wing size    |
| 104860         | CG9311 |            | lethal                         | lethal                 |
| 9156-RI (II)   | CG9156 | PPI-13C    | lethal                         | lethal                 |
| 107923 35988   | CG8637 | trc        | lethal                         | lethal                 |
| 35939          | CG8485 | SAP/SNRK   | lethal                         | lethal                 |
| 28895          | CG8351 | Tcp-1-etal | lethal                         | lethal                 |
| 107071 37279   | CG7904 | put        | lethal                         | lethal                 |
| 100708         | CG7873 | Src42A     | lethal                         | lethal                 |
| 3018           | CG7850 | puc        | lethal, decreased wing size@RT | lethal                 |
| 25508          | CG7597 |            | lethal                         | lethal                 |
| 107042 27808   | CG7028 |            | lethal                         | lethal                 |
| 27785          | CG7004 | fwd        | lethal                         | lethal                 |
| 104051         | CG6620 | ial        | lethal                         | lethal                 |

Parsons et al., Table S4

|                |         |           |                                  |                                |
|----------------|---------|-----------|----------------------------------|--------------------------------|
| 105525         | CG6593  | Ppl       | lethal                           | lethal                         |
| 101719 2895    | CG6518  | inaC      | lethal, decreased wing size@RT   | NE                             |
| 107998 6238 R4 | CG6238  | ssh       | lethal                           | decreased wing size            |
| 101475         | CG5671  | Pten      | lethal                           | lethal                         |
| 34990          | CG5387  | Cdk5      | lethal                           | lethal                         |
| 106130 41838   | CG5363  | cdc2      | crumpled, decreased wing size@RT | lethal, decreased wing size@RT |
| 103561 30448   | CG5179  | Cdk9      | lethal                           | lethal                         |
| 43783          | CG4527  | slik      | lethal, decreased wing size @RT  | NE                             |
| 105732 46425   | CG34412 | tlk       | lethal                           | decreased wing size            |
| 41693          | CG2577  | Ckla-like | lethal, crumpled wing@RT         | lethal, crumpled wing@RT       |
| 51227          | CG2252  | fs(h)     | lethal                           | lethal                         |
| 2055R-1        | CG2049  | PRK2      | lethal                           | lethal                         |
| 13664          | CG2028  | Ckl       | lethal                           | lethal                         |
| 101357 1388R-1 | CG18492 | Tak1      | lethal                           | lethal                         |
| 991            | CG18402 | InR       | lethal, decreased wing size@RT   | lethal, decreased wing size@RT |
| 41134 41136    | CG1725  | dgl       | lethal                           | lethal                         |
| 43783          | CG16973 | msn       | lethal                           | lethal                         |
| 39857          | CG14992 | Ack       | lethal                           | lethal                         |
| 105834 862     | CG14026 | tkv       | lethal                           | lethal                         |

Parsons et al., Table S4

|              |         |          |                                  |                                  |
|--------------|---------|----------|----------------------------------|----------------------------------|
| 106174       | CG12072 | wt       | lethal                           | lethal                           |
| 105395       | CG11660 |          | lethal                           | lethal                           |
| 106497       | CG11486 |          | lethal                           | crumpled wing                    |
| 104169       | CG11228 | hpo      | lethal, increased wing size @ RT | lethal, increased wing size @ RT |
| 100163 42947 | CG11221 | PKN      | lethal                           | lethal                           |
| 103426 16182 | CG1107  | aux      | lethal                           | lethal                           |
| 105624 2907  | CG10261 | aPKC     | lethal                           | lethal                           |
| 38319        | CG10033 | DG2, for | lethal                           | lethal                           |

**CLASS 2**

**Crumpled wing**

|              |         |         |                                  |                     |
|--------------|---------|---------|----------------------------------|---------------------|
| 105353 976   | CG8222  | Pvr     | crumpled wing                    |                     |
| 107158 49558 | CG5169  | Gckiii  | crumpled wing                    | crumpled wing       |
| 25317        | CG32505 | PP4-19C | crumpled wing                    | lethal              |
| 104677       | CG2096  | flw     | crumpled, decreased wing size@RT | decreased wing size |
| 46043        | CG18582 | mbt     | crumpled wing                    | crumpled wing       |
| 103976       | CG1609  | Gcn2    | crumpled wing                    | decreased wing size |
| 43123        | CG12559 | rl      | crumpled wing                    | crumpled wing       |

Parsons et al., Table S4

|                  |         |        |                                  |                        |
|------------------|---------|--------|----------------------------------|------------------------|
| 20177            | CG12306 | 20177  | crumpled wing                    | lethal                 |
| 105610 38647     | CG1227  |        | crumpled, decreased wing size@RT | crumpled wing          |
| 105614           | CG10260 |        | crumpled wing                    | crumpled wing          |
| <b>CLASS 3</b>   |         |        |                                  |                        |
| <b>Wing Size</b> |         |        |                                  |                        |
| 30098            | CG9784  |        | decreased wing size              | NE                     |
| 100985 28970     | CG8878  | VRK    | decreased wing size@RT           | decreased wing size@RT |
| 103725           | CG8866  |        | decreased wing size              | decreased wing size    |
| 103452 4176      | CG8805  | wun2   | decreased wing size              | decreased wing size    |
| 106962           | CG8049  | Btk29A | decreased wing size              | NE                     |
| 101545 3002      | CG7892  | nmo    | decreased wing size              | decreased wing size    |
| 7643 R-1         | CG7643  | Mps1   | decreased wing size              | decreased wing size    |
| 106098           | CG7378  |        | decreased wing size              | decreased wing size    |
| 106928           | CG7177  | Wnk    | decreased wing size              | decreased wing size    |
| 103354 9404      | CG7115  | PP2C   | decreased wing size              | NE                     |
| 103580 35166     | CG7097  | hppy   | decreased wing size              | decreased wing size    |
| 27591            | CG6355  | fab    | decreased wing size              | decreased wing size    |

Parsons et al., Table S4

|              |         |          |                        |                        |
|--------------|---------|----------|------------------------|------------------------|
| 103774       | CG5974  | pll      | decreased wing size    | decreased wing size    |
| 101406       | CG5643  | wdb      | decreased wing size@RT | decreased wing size@RT |
| 100396       | CG5565  |          | decreased wing size    | decreased wing size    |
| 932          | CG4926  | Ror      | decreased wing size    | NE                     |
| 101524       | CG4379  | Pka-C1   | decreased wing size    | decreased wing size    |
| 103739 26496 | CG4290  | SIK SIK2 | decreased wing size    | decreased wing size    |
| 105185       | CG34357 |          | decreased wing size    | decreased wing size    |
| 102192       | CG3915  | Drl-2    | decreased wing size    | decreased wing size    |
| 105549       | CG3837  | Sdr      | decreased wing size    | decreased wing size    |
| 101018       | CG32484 | SK2      | decreased wing size    | decreased wing size    |
| 105249       | CG2984  | Pp2cl    | decreased wing size    | decreased wing size    |
| 9241         | CG2048  | dco      | decreased wing size    | NE                     |
| 105483 32476 | CG1906  | alph     | decreased wing size    | decreased wing size    |
| 33054        | CG1830  | Phk      | decreased wing size@RT | decreased wing size@RT |
| 105884 35632 | CG17698 | CAMK1B   | decreased wing size    | NE                     |
| 103408       | CG17256 | Nek2     | decreased wing size    | decreased wing size    |
| 32854        | CG17090 | HIPK     | decreased wing size    | decreased wing size    |
| 102830       | CG1594  | hop      | decreased wing size    | decreased wing size    |
| 39864        | CG15072 | SIK3     | increased wing size    | NE                     |

Parsons et al., Table S4

|              |         |         |                     |                     |
|--------------|---------|---------|---------------------|---------------------|
| 105752       | CG14903 |         | decreased wing size | decreased wing size |
| 101997       | CG12217 | PpV     | decreased wing size | decreased wing size |
| 17432        | CG14217 | Tao-I   | increased wing size | increased wing size |
| 104555       | CG14212 |         | decreased wing size | decreased wing size |
| 106822       | CG12244 |         | decreased wing size | decreased wing size |
| 106088 16334 | CG11870 | NUAK    | decreased wing size | decreased wing size |
| 102021 16096 | CG10930 | PpY-55A | decreased wing size | decreased wing size |
| 106824       | CG10579 | Eip63E  | decreased wing size | NE                  |
| 107187 31264 | CG10572 | Cdk8    | decreased wing size | decreased wing size |
| 106180       | CG10417 |         | decreased wing size | decreased wing size |
| 101146 27368 | CG5182  |         | decreased wing size | decreased wing size |

Results and brief description of adult female wing phenotypes observed for the 93 genes that modified *en > Igli*. Genes highlighted in blue or yellow were identified as kinases or phosphatase regulators of Wnt signalling respectively (Swarup et al., 2015). Gene lists organized by Class. Genes ordered in accordance to CG number, highest to lowest. RNAi line refers to VDRC number and those numbers denoted with R were obtained from NIG (see *Drosophila* stocks, Materials and Methods for further information). All interactions are at 25°C unless stated otherwise.

**Table S5. Gene lists of overlapping modifier genes from Classes 1 - 4 (adult eye cell polarity screen) and *en > Igli* wing screen**Modifiers only in *GMR > aPKC<sup>CA</sup>* (Class 1 eye screen)

| RNAi line | CG      | Gene         |
|-----------|---------|--------------|
| 9856 R-1  | CG9856  | PTP-ER       |
| 104259    | CG9222  |              |
| 4659      | CG8657  | Dgk          |
| 107386    | CG8402  | PpD3         |
| 106421    | CG7497  |              |
| 105102    | CG7186  | SAK          |
| 27719     | CG6697  | Ublcpl       |
| 107001    | CG6297  | JIL-1        |
| 105568    | CG6036  |              |
| 34138     | CG5680  | bsk          |
| 105630    | CG5483  | IRRK         |
| 106774    | CG5408  | trbl         |
| 26641     | CG4839  | PRKG-like    |
| 104701    | CG4803  | Tak12        |
| 21611     | CG4209  | CanB         |
| 38985     | CG4141  | DP110 - PI3K |
| 2902      |         | Nipped-A     |
| 2905 R-3  | CG33554 | Unc-89       |
| 106267    | CG33519 | Smgl         |
| 4549 R-1  | CG32743 | sdt          |
| 100685    | CG32717 | Mulk         |
| 105621    | CG31873 | pyd          |
| 38863     | CG31349 | D-Raf - Phl  |
| 20909     | CG2845  | Dd           |
| 104785    | CG1696  |              |
| 105122    | CG13197 | Pi3K68D      |
| 16239     | CG11621 |              |
| 100842    | CG10702 | Plip         |
| 104774    | CG10371 | PpD5         |
| 104452    | CG10138 |              |

Modifiers only in *GMR > crb<sup>intra</sup>* (Class 2 eye screen)

| RNAi line | CG      | Gene  |
|-----------|---------|-------|
| 3793      | CG9774  | Ppml  |
| 9578-R4   | CG9578  | Reg-2 |
| 102633    | CG8914  |       |
| 105173    | CG33338 |       |
| 107185    | CG3200  |       |
| 105265    | CG17216 | KP78b |
| 107276    | CG15793 | Dsarl |

Parsons et al., Table S5

|              |         |           |         |
|--------------|---------|-----------|---------|
| 1016         | CG1389  | CKIa-like |         |
| 100863       | CG13850 |           |         |
| 101257       | CG12169 |           |         |
| 101875 31658 | CG12147 |           |         |
| 100800       | CG12091 | Tip41     |         |
| 102632       |         |           | CG11489 |
| 103749       |         |           | CG10082 |

Modifiers only in *GMR > aPKC<sup>CA</sup>* and *GMR > crb<sup>intra</sup>* (Class 3 eye screen)

| RNAi line | CG      | Gene    |
|-----------|---------|---------|
| 104688    | CG8867  | otk     |
| 107266    | CG8874  | Fps85D  |
| 853       | CG8224  | babo    |
| 106919    | CG7693  | fray    |
| 106255    | CG7125  | PKD     |
| 106826    | CG6963  | gish    |
| 26003     | CG6703  | CASK    |
| 104793    |         |         |
| 34184     | CG6114  | fbl     |
| 100717    |         |         |
| 101437    | CG5725  | Pi3K59F |
| 100296    | CG5373  | Pitslre |
| 107303    | CG4268  | Wsc     |
| 102481    | CG34384 |         |
| 1214      | CG31127 | skf     |
| 29965     | CG30021 | PPP4-R2 |
| 25445     | CG2890  | drl     |
| 20655     | CG18604 |         |
| 100039    | CG17348 | key     |
| 100257    | CG16910 | CklI    |
| 106845    | CG15224 | Pak3    |
| 107260    | CG14895 | Ptp99A  |
| 103457    | CG11516 | CanB2   |
| 104370    | CG11217 | Ptp69D  |
| 104761    | CG10975 | sti     |
| 10522 R-1 | CG10522 | Lar     |
| 107996    | CG10443 | PAK1    |
| 12553     | CG10295 |         |

Modifiers only in *GMR-GAL4* and *GMR > aPKC<sup>CA</sup>* and/or *GMR crb<sup>intra</sup>* (Class 4 eye screen)

| RNAi line | CG     | Gene |
|-----------|--------|------|
| 46873     | CG9842 | PP2B |
| 108071    | CG9554 | eya  |



Parsons et al., Table S5

|                                                                                                                                                                                                |                                                                                                                                                                                                           |                                                                                                                                                                             |
|------------------------------------------------------------------------------------------------------------------------------------------------------------------------------------------------|-----------------------------------------------------------------------------------------------------------------------------------------------------------------------------------------------------------|-----------------------------------------------------------------------------------------------------------------------------------------------------------------------------|
| 24143<br>104211<br>36047                                                                                                                                                                       | CG9351<br>CG8822                                                                                                                                                                                          | Fifi<br>PPI-like, Pp06                                                                                                                                                      |
| 103387<br>108018<br>34594<br>104427<br>105762<br>2615R-1<br>2615R-2<br>42457<br>100178<br>106119<br>32885<br>49671<br>32283<br>104884<br>17760<br>18736<br>38541<br>104369<br>104959<br>107130 | CG6292<br>CG4317<br>CG3324<br>CG32697<br>CG32156<br>CG2615<br><br>CG1891<br>CG17746<br>CG17603<br>CG17342<br>CG17291<br>CG1455<br>CG14211<br>CG1395<br>CG1210<br>CG11597<br>CG10539<br>CG10498<br>CG10079 | CycT<br>Mipp2<br>Pkg21D<br>I(1)G0232<br>Mbs<br>IKK-eR-1<br><br>Sax<br><br>TafI<br>MNK/LKG<br>Pp2A-29B<br>CanA1<br>MKP-4<br>stg<br>Pkb1C<br>PP4-like<br>S6K<br>cdc2c<br>Egfr |

Common modifiers in *en > lgli* (or *en-GAL4*) and *GMR > aPKC<sup>CA</sup>* (wing screen and Class 1)

| RNAi line | CG      | Gene       |
|-----------|---------|------------|
| 28895     | CG8351  | Tcp-1-etab |
| 107042    | CG7028  | PRP4       |
| 2895      | CG6518  | inaC       |
| 41693     | CG2577  | CKIa-like  |
| 104677    | CG2096  | flw        |
| 43123     | CG12559 | rl         |
| 106962    | CG8049  | Btk29A     |
| 101545    | CG7892  | nmo        |
| 7643 R-1  | CG7643  | ald        |
| 27591     | CG6355  | fabI       |
| 932       | CG4926  | Ror        |
| 16334     | CG11870 | Emk        |
| 102021    | CG10930 | PpY-55A    |
| 107187    | CG10572 | Cdk8       |

Common modifiers in *en > lgli* (or *en-GAL4*) and *GMR > crb<sup>intra</sup>* (wing screen and Class 2)

| RNAi line | CG      | Gene |
|-----------|---------|------|
| 103725    | CG8866  |      |
| 101018    | CG32484 | Sk2  |
| 33054     | CG1830  | PhkY |
| 106180    | CG10417 |      |

Common modifiers in *en > lgli* (or *en-GAL4*), *GMR > aPKC<sup>CA</sup>* and *GMR > crb<sup>intra</sup>* (wing screen and Class 3)

| RNAi line      | CG      | Gene     |
|----------------|---------|----------|
| 107923 35988   | CG8637  | trc      |
| 35939          | CG8485  | SAP/SNRK |
| 3018           | CG7850  | puc      |
| 25508          | CG7597  |          |
| 104051         | CG6620  | ial      |
| 107998 6238 R4 | CG6238  | ssh      |
| 101475         | CG5671  | Pten     |
| 34990          |         |          |
| 103561 30448   | CG5387  | Cdk5     |
| 101357 1388R-1 | CG5179  | Cdk9     |
| 105834 862     | CG18492 | Tak1     |
| 105395         |         |          |
| 103426 16182   | CG14026 | tkv      |
| 105624 2907    | CG11660 |          |
| 46043          | CG1107  | aux      |
| 20177          |         |          |
| 105610 38647   | CG10261 | aPKC     |
| 105614         |         |          |
| 30098          | CG18582 | mbt      |
| 100985 28970   | CG12306 | POLO     |
| 103452 4176    | CG1227  | CG1227   |
| 106098         | CG10260 |          |
| 103354 9404    | CG9784  |          |
| 103580 35166   | CG8878  | VRK      |
| 103774         |         |          |
| 101406         | CG8805  | wun2     |
| 100396         |         |          |
| 101524         | CG7378  |          |
|                | CG7115  | PP2C     |
| 103739 26496   |         |          |
| 105185         | CG7097  | hppy     |
| 102192         |         |          |
| 105549         | CG5974  | p11      |
| 105249         | CG5643  | wdb      |
|                | CG5565  |          |

Parsons et al., Table S5

|              |         |          |
|--------------|---------|----------|
| 9241         | CG4379  | Pka-C1   |
| 105483 32476 | CG4290  | SIK SIK2 |
| 105884 35632 |         |          |
| 103408       | CG34357 |          |
| 32854        | CG3915  | Dr1-2    |
| 102830       | CG3837  | Sdr      |
| 39864        | CG2984  | Pp2cl    |
| 105752       | CG2048  | dco      |
| 17432        | CG1906  | alph     |
| 104555       | CG17698 | CAMK1B   |
| 106822       |         |          |
| 106824       | CG17256 | Nek2     |
| 101146 27368 | CG17090 | HIPK     |
|              | CG1594  | hop      |
|              | CG15072 | SIK3     |
|              | CG14903 |          |
|              | CG14217 | Tao-1    |
|              | CG14212 |          |
|              | CG12244 |          |
|              | CG10579 | Eip63E   |
|              | CG5182  |          |

Common modifiers in *en > Igli* (or *en-GAL4*) and *GMR-GAL4* and *GMR > aPKC<sup>CA</sup>* and/or *GMR > crb<sup>intra</sup>* (Class 4).

| RNAi line      | CG      | Gene    |
|----------------|---------|---------|
| 101624         | CG9985  | skt1    |
| 6229           |         |         |
| 40743          | CG9493  | Pez     |
| 104860         | CG9311  |         |
| 9156-R1 (II)   | CG9156  | PPI-13C |
| 107071 37279   | CG7904  | put     |
| 100708         | CG7873  | Src42A  |
| 27785          | CG7004  | fwd     |
| 105525         | CG6593  | Ppl     |
| 106130 41838   | CG5363  | cdc2    |
| 43783          | CG4527  | slik    |
| 105732 46425   | CG34412 | tlk     |
| 51227          | CG2252  | fs(h)   |
| 2055R-1        | CG2049  | PRK2    |
| 13664          | CG2028  | Gkl     |
| 991            | CG18402 | lnR     |
| 41134 41136    | CG1725  | dlg     |
| 16973R-1 (III) | CG16973 | msn     |
| 39857          | CG14992 | Ack     |

Parsons et al., Table S5

|              |         |          |
|--------------|---------|----------|
| 106174       | CG12072 | wts      |
| 106497       | CG11486 |          |
| 104169       | CG11228 | hpo      |
| 100163 42947 | CG11221 | PKN      |
| 38319        | CG10033 | DG2, for |
| 105353 976   | CG8222  | Pvr      |
| 107158 49558 | CG5169  | Gckiii   |
| 25317        | CG32505 | PP4-19C  |
| 103976       | CG1609  | Gcn2     |
| 106928       | CG7177  | Wnk      |
| 101997       | CG12217 | PpV      |

Gene lists organized by Class. Genes ordered in accordance to CG number, highest to lowest. RNAi line refers to VDRC number and those numbers denoted with R were obtained from NIG (see *Drosophila* stocks, Materials and Methods for further information).

**Table S6. *en* > *lgli* Group 3 Wing Size Subclasses**

| Group 3 Wing size Subclasses                                                                 | Gene                                                                                                                                                                                                                                                                                                                                                                     |
|----------------------------------------------------------------------------------------------|--------------------------------------------------------------------------------------------------------------------------------------------------------------------------------------------------------------------------------------------------------------------------------------------------------------------------------------------------------------------------|
| Subclass 3.1: <i>en</i> > <i>lgli</i> only modifier                                          | <i>Btk29A</i> , <i>PP2C</i> , <i>CG9784</i> , <i>Ror</i> , <i>dco</i> , <i>CAMK1B</i> , <i>Eip63E</i>                                                                                                                                                                                                                                                                    |
| Subclass 3.2: <i>en-GAL4</i> and <i>en</i> > <i>lgli</i> modified equivalently               | <i>fabI</i> , <i>Phkγ</i> , <i>nmo</i> , <i>CdkB</i> , <i>ald</i> , <i>NUAK</i> , <i>hppy</i> , <i>Pk34A</i> , <i>alph</i> , <i>*Sk2</i> , <i>*hop</i> , <i>*p11</i> , <i>*lic</i> , <i>*CG8866</i> , <i>*CG14212</i> , <i>*CG14903</i> , <i>*CG7378</i> , <i>*Wnk</i> , <i>*CG10417</i> , <i>*Dr1-2</i> , <i>*Nek2</i> , <i>*Sdr</i> , <i>*CG5565</i> , <i>*CG34357</i> |
| Subclass 3.3: <i>en</i> > <i>lgli</i> smaller than <i>en-GAL4</i> alone                      | <i>VRK</i> , <i>wdb</i> , <i>Pka-C1</i> , <i>PpV</i> , <i>PpY-55A</i> , <i>SIK2</i> , <i>Pp2cl</i> , <i>wun2</i> , <i>HIPK</i>                                                                                                                                                                                                                                           |
| Subclass 3.4: increase in wing size <i>en</i> > <i>lgli</i> larger than <i>en-GAL4</i> alone | <i>SIK3</i> , <i>Tao-1</i>                                                                                                                                                                                                                                                                                                                                               |

Analysis of modifier genes that altered *en* > *lgli* wing size compared with *en* – *GAL4* revealed different subclasses. Subclass 1 modifier genes only affected *en* > *lgli* wing size. Subclass 2 modifier genes decreased wing size in both *en* - *GAL4* and *en* > *lgli* equivalently. Subclass 3 modifier genes that impacted *en* > *lgli* wing size to a greater extent than control *en* - *GAL4* wings. Subclass 4 modifier genes increased wing size. Gene lists organized by Class. Genes highlighted in blue or yellow were identified as kinases or phosphatase regulators of Wnt signalling, respectively (Swarup et al., 2015). \* Indicate genes identified by KK lines, which may be false positive due to the modification of *tio* gene expression, although these were not interactors with *GMR*>*crb*. Ones highlighted in red text indicate genes identified by KK lines that also interact with *GMR*>*crb*, and are potential false positives due to their potential effect on *tio* gene expression.

**Table S7. Lists of modifier genes of Wing Size Class 3 that modified *en > Igli*, greater than *en-GAL4* alone (Classes 3.1, 3.3, 3.4).**

| <i>en &gt; Igli</i> Interactor                          | <i>GMR &gt; aPKC</i> | <i>GMR &gt; Crb</i> | <i>GMR &gt; GAL4</i> | Gene Function in signalling pathways  |
|---------------------------------------------------------|----------------------|---------------------|----------------------|---------------------------------------|
| <b>Class 3.1</b>                                        |                      |                     |                      |                                       |
| <i>Btk29A</i>                                           | +                    |                     |                      | Src                                   |
| <i>PP2C</i>                                             | +                    | +                   |                      | Wingless                              |
| <i>CG9784 (IPP)</i><br>(Inositol phosphate phosphatase) | +                    | +                   |                      | Lipid/PI3K                            |
| <i>Ror</i> (Receptor Tyrosine Kinase)                   | +                    |                     |                      | -                                     |
| <i>dco</i>                                              | +                    | +                   |                      | Wingless, Hedgehog, Hippo, Ras        |
| <i>CAMKIIIB (CG17698)</i>                               | +                    | +                   |                      | -                                     |
| <i>Eip63E</i> (Cyclin-dependent protein kinase)         | +                    | +                   |                      | Wingless, Ras                         |
|                                                         |                      |                     |                      |                                       |
| <b>Class 3.3</b>                                        |                      |                     |                      |                                       |
| <i>VRK (CG8878)</i>                                     | +                    | +                   |                      | Wingless, Ras                         |
| <i>wdb (PP2A)</i>                                       | +                    | +                   |                      | Wingless, P13K                        |
| <i>Pka-C1</i>                                           | +                    | +                   |                      | Wingless, Ras, Hedgehog, Dpp          |
| <i>PpV</i>                                              | +                    | +                   | +                    | Wingless, Ras                         |
| <i>PpY-55A</i>                                          | +                    |                     |                      | -                                     |
| <i>SIK2</i>                                             | +                    | +                   |                      | Hippo                                 |
| <i>Pp2c1</i>                                            | +                    | +                   |                      | Wingless                              |
| <i>wun2</i> (Lipid phosphate phosphatase)               | +                    | +                   |                      | Wingless, Lipid/PI3K                  |
| <i>HIPK</i>                                             | +                    | +                   |                      | Wingless, Notch, Hippo, Hedgehog, JNK |
|                                                         |                      |                     |                      |                                       |
| <b>Class 3.4</b>                                        |                      |                     |                      |                                       |
| <i>SIK3</i>                                             | +                    | +                   |                      | Hippo                                 |
| <i>Tao-1</i>                                            | +                    | +                   |                      | Hippo                                 |

Gene lists organized by Class. Genes highlighted in blue or yellow were identified as kinases or phosphatase regulators of Wnt signalling respectively (Swarup et al., 2015). Functions of genes in signalling pathways are listed, as revealed from Flybase records.

## **SUPPLEMENTAL LITERATURE CITED**

- Swarup, S., T. Pradhan-Sundd, and E.M. Verheyen. 2015. Genome-wide identification of phospho-regulators of Wnt signaling in *Drosophila*. *Development*. 142:1502-1515.
- Tyler, D.M., and N.E. Baker. 2007. Expanded and fat regulate growth and differentiation in the *Drosophila* eye through multiple signaling pathways. *Dev Biol*. 305:187-201.
